# Supplementary material for: Effects of Energy Delivery Guided by Indirect Calorimetry in Critically Ill Patients: A Systematic Review and Meta-Analysis
Source: MDPI journal article supplement (doi:10.3390/nu16101452), 2024-05-11
Supplement: s1 [file s1]

## Supplemental file

### Effects of Energy Delivery Guided by Indirect Calorimetry in Critically Ill Patients: A Systematic Review and Meta-Analysis

Shinichi Watanabe 1, Hiroo Izumino 2, Yudai Takatani 3, Rie Tsutsumi 4, Takahiro Suzuki 5, Hiroomi Tatsumi 6,

Ryo Yamamoto 7, Takeaki Sato 8, Tomoka Miyagi 9, Isao Miyajima 10, Kensuke Nakamura 11, Naoki Higashibeppu 12

and Joji Kotani 13,\*

1 Department of Physical Therapy, Faculty of Rehabilitation, Gifu University of Health Science,

2-92 Higashiuzura, Gifu 500-8281, Japan; s-watanabe@gifuhoken.ac.jp

2 Acute and Critical Care Center, Nagasaki University Hospital, 1-7-1 Sakamoto, Nagasaki 852-8501, Japan; izumino@nagasaki-u.ac.jp

3 Department of Primary Care and Emergency Medicine, Kyoto University Hospital,

54 Shogoin-Kawahara-cho, Sakyo-ku, Kyoto 606-8507, Japan; takataniyu@kuhp.kyoto-u.ac.jp

4 Department of Nutrition and Metabolism, Institute of Biomedical Sciences, Tokushima University Graduate School, 3-18-15 Kuramoto, Tokushima 770-8503, Japan; rtsutsumi@tokushima-u.ac.jp

5 Department of Cardiovascular Medicine, St. Luke's International Hospital, 9-1 Akashi-cho, Chuo-ku,

Tokyo 104-8560, Japan; takasu.623@gmail.com

6 Department of Intensive Care Medicine, Sapporo Medical University School of Medicine, S1 W17, Chuo-ku,

Sapporo 060-8556, Japan; htatsumi@sapmed.ac.jp

7 Department of Emergency and Critical Care Medicine, Keio University School of Medicine,

35 Shinanomachi, Shinjuku-ku, Tokyo 160-8582, Japan; ryoyamamoto@keio.jp

8 Emergency Center, Tohoku University Hospital, 1-1 Seiryomachi, Aoba-ku,

Sendai 980-8574, Japan; takesato@hkg.odn.ne.jp

9 Department of Nutrition, Yokosuka General Hospital, 2-36 Uwamachi,  
Yokosuka 238-8567, Japan; 10mtn.3@gmail.com

10 Department of Clinical Nutrition, Chikamori Hospital, 1-1-16 Okawasuzi,  
Kochi 780-8522, Japan; miyajimai@y6.dion.ne.jp

11 Department of Intensive Care, Yokohama City University Hospital, 3-9  
Fukuura, Kanazawa-ku,  
Yokohama 236-0064, Japan; mamashockpapashock@yahoo.co.jp

12 Department of Anesthesiology and Nutrition Support Team, Kobe City  
Medical Center General Hospital,  
2-1-1 Minatojima Minamimachi, Chuo-ku, Kobe 650-0047, Japan;  
gashibe@hotmail.com

13 Division of Disaster and Emergency Medicine, Department of Surgery Related,  
Kobe University Graduate School of Medicine, 7-5-1 Kusunoki-cho, Chuo-ku, Kobe  
650-0017, Japan

\* Correspondence: kotanijo0412@gmail.com; Tel.: +81-78-382-6521

## **Contents**

1. Reporting checklist.
2. Search strategies.
3. Studies excluded from full-text screening
4. Algorithm for the risk of bias judgment
5. Risk-of-bias summary and graph
6. Forest plot for outcomes.
7. Post-hoc analyses of primary outcomes
8. Subgroup analysis
9. Evidence profile

## 1. Reporting checklist.

| Section and Topic       | Item # | Checklist item                                                                                                                                                                                                                                                                                       | Location where item is reported |
|-------------------------|--------|------------------------------------------------------------------------------------------------------------------------------------------------------------------------------------------------------------------------------------------------------------------------------------------------------|---------------------------------|
| <b>TITLE</b>            |        |                                                                                                                                                                                                                                                                                                      |                                 |
| Title                   | 1      | Identify the report as a systematic review.                                                                                                                                                                                                                                                          | Page 1                          |
| <b>ABSTRACT</b>         |        |                                                                                                                                                                                                                                                                                                      |                                 |
| Abstract                | 2      | See the PRISMA 2020 for Abstracts checklist.                                                                                                                                                                                                                                                         | Page 3                          |
| <b>INTRODUCTION</b>     |        |                                                                                                                                                                                                                                                                                                      |                                 |
| Rationale               | 3      | Describe the rationale for the review in the context of existing knowledge.                                                                                                                                                                                                                          | Page 4                          |
| Objectives              | 4      | Provide an explicit statement of the objective(s) or question(s) the review addresses.                                                                                                                                                                                                               | Page 4                          |
| <b>METHODS</b>          |        |                                                                                                                                                                                                                                                                                                      |                                 |
| Eligibility criteria    | 5      | Specify the inclusion and exclusion criteria for the review and how studies were grouped for the syntheses.                                                                                                                                                                                          | Page 4,5                        |
| Information sources     | 6      | Specify all databases, registers, websites, organisations, reference lists and other sources searched or consulted to identify studies. Specify the date when each source was last searched or consulted.                                                                                            | Page 5                          |
| Search strategy         | 7      | Present the full search strategies for all databases, registers and websites, including any filters and limits used.                                                                                                                                                                                 | Supplemental Table S2           |
| Selection process       | 8      | Specify the methods used to decide whether a study met the inclusion criteria of the review, including how many reviewers screened each record and each report retrieved, whether they worked independently, and if applicable, details of automation tools used in the process.                     | Page 5                          |
| Data collection process | 9      | Specify the methods used to collect data from reports, including how many reviewers collected data from each report, whether they worked independently, any processes for obtaining or confirming data from study investigators, and if applicable, details of automation tools used in the process. | Page 5,6                        |
| Data items              | 10a    | List and define all outcomes for which data were sought. Specify whether all results that were compatible with each outcome domain in each study were sought (e.g. for all measures, time points, analyses), and if not, the methods used to decide which results to collect.                        | Page 6                          |
|                         | 10b    | List and define all other variables for which data were sought (e.g. participant and intervention characteristics, funding sources). Describe any assumptions made about any missing or unclear information.                                                                                         | Table 1                         |
| Study risk of           | 11     | Specify the methods used to assess risk of bias in the included                                                                                                                                                                                                                                      | Page 6                          |

| Section and Topic         | Item # | Checklist item                                                                                                                                                                                                                                              | Location where item is reported |
|---------------------------|--------|-------------------------------------------------------------------------------------------------------------------------------------------------------------------------------------------------------------------------------------------------------------|---------------------------------|
| bias assessment           |        | studies, including details of the tool(s) used, how many reviewers assessed each study and whether they worked independently, and if applicable, details of automation tools used in the process.                                                           |                                 |
| Effect measures           | 12     | Specify for each outcome the effect measure(s) (e.g. risk ratio, mean difference) used in the synthesis or presentation of results.                                                                                                                         | Page 6,7                        |
| Synthesis methods         | 13a    | Describe the processes used to decide which studies were eligible for each synthesis (e.g. tabulating the study intervention characteristics and comparing against the planned groups for each synthesis (item #5)).                                        | Page 6, Table 1                 |
|                           | 13b    | Describe any methods required to prepare the data for presentation or synthesis, such as handling of missing summary statistics, or data conversions.                                                                                                       | Page 5                          |
|                           | 13c    | Describe any methods used to tabulate or visually display results of individual studies and syntheses.                                                                                                                                                      | Page 5, Figure 1                |
|                           | 13d    | Describe any methods used to synthesize results and provide a rationale for the choice(s). If meta-analysis was performed, describe the model(s), method(s) to identify the presence and extent of statistical heterogeneity, and software package(s) used. | Page 6                          |
|                           | 13e    | Describe any methods used to explore possible causes of heterogeneity among study results (e.g. subgroup analysis, meta-regression).                                                                                                                        | Page 6                          |
|                           | 13f    | Describe any sensitivity analyses conducted to assess robustness of the synthesized results.                                                                                                                                                                | Page 6                          |
| Reporting bias assessment | 14     | Describe any methods used to assess risk of bias due to missing results in a synthesis (arising from reporting biases).                                                                                                                                     | Page 6,7                        |
| Certainty assessment      | 15     | Describe any methods used to assess certainty (or confidence) in the body of evidence for an outcome.                                                                                                                                                       | Page 6,7                        |
| <b>RESULTS</b>            |        |                                                                                                                                                                                                                                                             |                                 |
| Study selection           | 16a    | Describe the results of the search and selection process, from the number of records identified in the search to the number of studies included in the review, ideally using a flow diagram.                                                                | Figure 1                        |
|                           | 16b    | Cite studies that might appear to meet the inclusion criteria, but which were excluded, and explain why they were excluded.                                                                                                                                 | Supplemental Table S3           |
| Study                     | 17     | Cite each included study and present its characteristics.                                                                                                                                                                                                   | Table 1                         |

| Section and Topic             | Item # | Checklist item                                                                                                                                                                                                                                                                       | Location where item is reported  |
|-------------------------------|--------|--------------------------------------------------------------------------------------------------------------------------------------------------------------------------------------------------------------------------------------------------------------------------------------|----------------------------------|
| characteristics               |        |                                                                                                                                                                                                                                                                                      |                                  |
| Risk of bias in studies       | 18     | Present assessments of risk of bias for each included study.                                                                                                                                                                                                                         | Table 2                          |
| Results of individual studies | 19     | For all outcomes, present, for each study: (a) summary statistics for each group (where appropriate) and (b) an effect estimate and its precision (e.g. confidence/credible interval), ideally using structured tables or plots.                                                     | Figure 2                         |
| Results of syntheses          | 20a    | For each synthesis, briefly summarise the characteristics and risk of bias among contributing studies.                                                                                                                                                                               | Page 8,9                         |
|                               | 20b    | Present results of all statistical syntheses conducted. If meta-analysis was done, present for each the summary estimate and its precision (e.g. confidence/credible interval) and measures of statistical heterogeneity. If comparing groups, describe the direction of the effect. | Page 8,9, Figure 2               |
|                               | 20c    | Present results of all investigations of possible causes of heterogeneity among study results.                                                                                                                                                                                       | Page 8,9, Supplemental Figure S2 |
|                               | 20d    | Present results of all sensitivity analyses conducted to assess the robustness of the synthesized results.                                                                                                                                                                           | Page 10, Figure 3                |
| Reporting biases              | 21     | Present assessments of risk of bias due to missing results (arising from reporting biases) for each synthesis assessed.                                                                                                                                                              | Page 8,9,10                      |
| Certainty of evidence         | 22     | Present assessments of certainty (or confidence) in the body of evidence for each outcome assessed.                                                                                                                                                                                  | Page 8,9,10, Figure 2            |
| <b>DISCUSSION</b>             |        |                                                                                                                                                                                                                                                                                      |                                  |
| Discussion                    | 23a    | Provide a general interpretation of the results in the context of other evidence.                                                                                                                                                                                                    | Page 11,12                       |
|                               | 23b    | Discuss any limitations of the evidence included in the review.                                                                                                                                                                                                                      | Page 12                          |
|                               | 23c    | Discuss any limitations of the review processes used.                                                                                                                                                                                                                                | Page 12,13                       |
|                               | 23d    | Discuss implications of the results for practice, policy, and future research.                                                                                                                                                                                                       | Page 12,13                       |
| <b>OTHER INFORMATION</b>      |        |                                                                                                                                                                                                                                                                                      |                                  |
| Registration and protocol     | 24a    | Provide registration information for the review, including register name and registration number, or state that the review was not registered.                                                                                                                                       | Page 14                          |
|                               | 24b    | Indicate where the review protocol can be accessed, or state that a protocol was not prepared.                                                                                                                                                                                       | Page 14                          |
|                               | 24c    | Describe and explain any amendments to information                                                                                                                                                                                                                                   | Not                              |

| Section and Topic                              | Item # | Checklist item                                                                                                                                                                                                                             | Location where item is reported |
|------------------------------------------------|--------|--------------------------------------------------------------------------------------------------------------------------------------------------------------------------------------------------------------------------------------------|---------------------------------|
|                                                |        | provided at registration or in the protocol.                                                                                                                                                                                               | applicable                      |
| Support                                        | 25     | Describe sources of financial or non-financial support for the review, and the role of the funders or sponsors in the review.                                                                                                              | Page 14                         |
| Competing interests                            | 26     | Declare any competing interests of review authors.                                                                                                                                                                                         | Page 14                         |
| Availability of data, code and other materials | 27     | Report which of the following are publicly available and where they can be found: template data collection forms; data extracted from included studies; data used for all analyses; analytic code; any other materials used in the review. | Page 15                         |

**Supplementary Table S1. Preferred Reporting Items for Systematic Review and Meta-Analysis (PRISMA) 2020 Checklist (From: Page MJ, McKenzie JE, Bossuyt PM, Boutron I, Hoffmann TC, Mulrow CD, et al. The PRISMA 2020 statement: an updated guideline for reporting systematic reviews. BMJ. 2021;372:n71. <https://doi.org/10.1136/bmj.n71>)**

## 2. Search strategies

### MEDLINE via PubMed search strategy (Searched in April 20, 2023)

|    |                                                                                                                                                                                                                                                                                                                                                                                                                                                                                                                                                                                                                                                                                                                                                                                                                                                                                                                                                                                                                                                                                                                                                                                                                                                                                                                                                                   |           |
|----|-------------------------------------------------------------------------------------------------------------------------------------------------------------------------------------------------------------------------------------------------------------------------------------------------------------------------------------------------------------------------------------------------------------------------------------------------------------------------------------------------------------------------------------------------------------------------------------------------------------------------------------------------------------------------------------------------------------------------------------------------------------------------------------------------------------------------------------------------------------------------------------------------------------------------------------------------------------------------------------------------------------------------------------------------------------------------------------------------------------------------------------------------------------------------------------------------------------------------------------------------------------------------------------------------------------------------------------------------------------------|-----------|
| #1 | "Critical Illness"[MeSH Terms] OR "critical care"[MeSH Terms] OR "critical*" [Title/Abstract] OR "severe"[Title/Abstract] OR "intensive care units"[MeSH Terms] OR "intensive"[Title/Abstract] OR "ICU"[Title/Abstract] OR "CCU"[Title/Abstract] OR "coronary care unit*" [Title/Abstract] OR "HDU"[Title/Abstract] OR "RCU"[Title/Abstract] OR "respiratory care unit*" [Title/Abstract] OR "ITU"[Title/Abstract] OR "burn unit*" [Title/Abstract] OR "burn center*" [Title/Abstract] OR "recovery room*" [Title/Abstract] OR "respiration, artificial"[MeSH Terms] OR "Artificial Respiration"[Title/Abstract:~3] OR "Artificial Respirations"[Title/Abstract:~3] OR "Ventilation Mechanical"[Title/Abstract:~3] OR "Ventilations Mechanical"[Title/Abstract:~3] OR "shock"[MeSH Terms] OR "circulatory failure"[Title/Abstract:~3] OR "circulatory collapse"[Title/Abstract:~3] OR "multiple organ"[Title/Abstract] OR "MODS"[Title/Abstract] OR "Respiratory Insufficiency"[MeSH Terms] OR "respiratory failure"[Title/Abstract:~3] OR "respiratory failures"[Title/Abstract:~3] OR "respiratory depression"[Title/Abstract:~3] OR "ventilatory depression"[Title/Abstract:~3] OR "sepsis"[MeSH Terms] OR "sepsis"[Title/Abstract] OR "septic"[Title/Abstract] OR "Wounds and Injuries"[mesh] OR burn*[tiab] OR trauma*[tiab] OR Injur*[tiab] OR wound*[tiab] | 4,537,953 |
| #2 | "calorimetry, indirect"[MeSH Terms] OR "Indirect Calorimetry"[Title/Abstract:~3] OR "indirect calorimet*" [Title/Abstract] OR "Calorimetry Respiration"[Title/Abstract:~3] OR "calorimetry respiration*" [Title/Abstract] OR "metabolic chamber"[Title/Abstract] OR "indirect energy measurement"[Title/Abstract:~3] OR "indirect calorie measurement"[Title/Abstract:~3]                                                                                                                                                                                                                                                                                                                                                                                                                                                                                                                                                                                                                                                                                                                                                                                                                                                                                                                                                                                         | 9,078     |
| #3 | "randomized controlled trial"[Publication Type] OR "controlled clinical trial"[Publication Type] OR "randomized"[Title/Abstract] OR "placebo"[Title/Abstract] OR "drug therapy"[MeSH Subheading] OR "randomly"[Title/Abstract] OR "trial"[Title/Abstract] OR "groups"[Title/Abstract]) NOT ("animals"[MeSH Terms] NOT "humans"[MeSH Terms])                                                                                                                                                                                                                                                                                                                                                                                                                                                                                                                                                                                                                                                                                                                                                                                                                                                                                                                                                                                                                       | 4,988,719 |



|    |                                                                   |     |
|----|-------------------------------------------------------------------|-----|
| #4 | #1 and #2 and #3                                                  | 421 |
| #5 | "1940/01/01"[Date - Create] : "2023/03/31"[Date - Create]) and #4 | 421 |

**The Cochrane Central Register of Controlled Trials (CENTRAL)**  
**(Searched in April 20, 2023)**

|    |                                                                                                                                                                                                                                                                                                                                                                                                                                                                                                                                                                                                                                                                                                                                                                         |        |
|----|-------------------------------------------------------------------------------------------------------------------------------------------------------------------------------------------------------------------------------------------------------------------------------------------------------------------------------------------------------------------------------------------------------------------------------------------------------------------------------------------------------------------------------------------------------------------------------------------------------------------------------------------------------------------------------------------------------------------------------------------------------------------------|--------|
| #1 | [mh "Critical Illness"] or [mh "critical care"] or [mh "intensive care units"] or [mh "respiration, artificial"] or [mh shock] or [mh "respiratory insufficiency"] or [mh sepsis] or [mh "Wounds and Injuries"]                                                                                                                                                                                                                                                                                                                                                                                                                                                                                                                                                         | 58781  |
| #2 | (critical*):ti,ab,kw or (severe):ti,ab,kw or (ICU):ti,ab,kw or (CCU):ti,ab,kw or (HDU):ti,ab,kw or (ITU):ti,ab,kw or (burn near/3 (unit* or center*)):ti,ab,kw or (recovery room*):ti,ab,kw or (artificial near/3 respirat*):ti,ab,kw or (ventilat* near/3 mechanical):ti,ab,kw or (circulat* near/3 (failure* or collapse*)):ti,ab,kw or ("multiple organ"):ti,ab,kw or (MODS):ti,ab,kw or (respirat* near/3 (failure* or depression*)):ti,ab,kw or (ventilat* near/3 (failure* or depression*)):ti,ab,kw or (sepsis):ti,ab,kw or (septic):ti,ab,kw or ("coronary care" unit*):ti,ab,kw or (RCU):ti,ab,kw or ("respiratory care" unit*):ti,ab,kw (burn*):ti,ab,kw or (trauma*):ti,ab,kw or (Injur*):ti,ab,kw or (wound*):ti,ab,kw (Word variations have been searched) | 428503 |
| #3 | (intensive):ti,ab,kw                                                                                                                                                                                                                                                                                                                                                                                                                                                                                                                                                                                                                                                                                                                                                    | 50902  |
| #4 | {OR #1-#3}                                                                                                                                                                                                                                                                                                                                                                                                                                                                                                                                                                                                                                                                                                                                                              | 466397 |
| #5 | [mh "calorimetry, indirect"]                                                                                                                                                                                                                                                                                                                                                                                                                                                                                                                                                                                                                                                                                                                                            | 522    |
| #6 | (indirect* near/3 calorimetr*):ti,ab,kw or (calorimetr* near/3 respirat*):ti,ab,kw or (metabolic chamber):ti,ab,kw or (indirect near/2 energy near/2 measurement):ti,ab,kw or (indirect near/2 calorie near/2 measurement):ti,ab,kw (Word variations have been searched)                                                                                                                                                                                                                                                                                                                                                                                                                                                                                                | 2742   |
| #7 | {OR #5-#6}                                                                                                                                                                                                                                                                                                                                                                                                                                                                                                                                                                                                                                                                                                                                                              | 2742   |
| #8 | #4 and #7 in Trials                                                                                                                                                                                                                                                                                                                                                                                                                                                                                                                                                                                                                                                                                                                                                     | 532    |

**Igaku-Chuo-Zasshi (ICHUSHI) (Searched in April 20, 2023)**

|    |                                                                                                                                                                                                                                                                                                                                                                                                                                                                                                                                                                                          |           |
|----|------------------------------------------------------------------------------------------------------------------------------------------------------------------------------------------------------------------------------------------------------------------------------------------------------------------------------------------------------------------------------------------------------------------------------------------------------------------------------------------------------------------------------------------------------------------------------------------|-----------|
| #1 | (危篤/TH) or (末期状態/TA) or (救命/TA) or (集中治療/TA) or (クリティカル/TA) or (重症/TA) or (ICU/TH) or (集中治療/TA) or (ICU/TA) or (CCU/TA) or (冠疾患集中治療/TA) or (HDU/TA) or (RCU/TH) or (呼吸管理室/TA) or (呼吸集中治療/TA) or (ITU/TA) or (熱傷センター/TA) or (回復室/TA) or (リカバリー/TA) or (人工呼吸/TH) or (レスピレーター/TA) or (機械的換気/TA) or (人工換気/TA) or (人工呼吸/TA) or (ショック/TH) or (多臓器不全/TA) or (急性循環不全/TA) or (ショック/TA) or (循環虚脱/TA) or (呼吸不全/TH) or (呼吸不全/TA) or (呼吸機能不全/TA) or (敗血症/TH) or (敗血症/TA) or (敗血性/TA) or (創傷と損傷/TH) or (火傷/TA) or (熱傷/TA) or (外傷/TA) or (損傷/TA) or (けが/TA) or (怪我/TA) or (傷害/TA) or (創傷/TA) or (負傷/TA) | 1,234,395 |
| #2 | ((間接的熱量測定/TH) or (間接/TA and 熱量/TA) or (間接/TA and カロリー/TA)))                                                                                                                                                                                                                                                                                                                                                                                                                                                                                                                              | 1,054     |
| #3 | #1 or #2                                                                                                                                                                                                                                                                                                                                                                                                                                                                                                                                                                                 | 336       |

**Supplementary Table S2. Search strategies**

### 3. Studies excluded from full-text screening

| First investigator | Journal                                               | Title                                                                                                                                                               | Reason for exclusion                          |
|--------------------|-------------------------------------------------------|---------------------------------------------------------------------------------------------------------------------------------------------------------------------|-----------------------------------------------|
| Anbar, R           | Clin Nutr Supplements                                 | Tight calorie control in geriatric hip fracture patients: preliminary results of geriatric ticacos study                                                            | Congress abstract<br>Protocol without results |
| Anbar, R           | Clin Nutr Supplements                                 | Tight calorie control (TICACOS) in geriatric hip fracture patients                                                                                                  | Congress abstract                             |
| Azevedo, JRA       | Clin Nutr Supplements                                 | Optimized caloric-protein nutrition in critically ill patients. Impact on short and long-term outcomes                                                              | Congress abstract                             |
| Berger, MM         | Clin Nutr Supplements                                 | Supplemental parenteral nutrition does not alter substrate metabolism but improves immunity: the SPN2 randomized trial                                              | Congress abstract                             |
| Berger, MM         | Clin Nutr                                             | Supplemental parenteral nutrition improves immunity with unchanged carbohydrate and protein metabolism in critically ill patients: The SPN2 randomized tracer study | Wrong intervention                            |
| Das, KC            | ANESTHESIA                                            | Nutrition in stroke patients: comparison of indirect calorimetry vs. Standard weight-based regimen                                                                  | Congress abstract                             |
| Azevedo, JRA       | BMC Anesthesiol                                       | High-protein intake and early exercise in adult intensive care patients: a prospective, randomized controlled trial to evaluate the impact on functional outcomes   | Wrong intervention                            |
| Dube, S            | Journal of neurosurgical anesthesiology               | Use of indirect calorimetry to assess outcome in stroke patients: a comparison with standard weight-based formula                                                   | Congress abstract                             |
| Leiderman, I       | Clin Nutr Supplements                                 | Implementation of nutritional support guidelines decreased days of mechanical ventilation and loss in surgical ICU                                                  | Congress abstract                             |
| (Not               | <a href="https://www.medifin">https://www.medifin</a> | Utilization of indirect                                                                                                                                             | Protocol                                      |

|                  |                                                                                                                                                             |                                                                                                                                                         |                          |
|------------------|-------------------------------------------------------------------------------------------------------------------------------------------------------------|---------------------------------------------------------------------------------------------------------------------------------------------------------|--------------------------|
| applicable)      | d.com/articles/clinical-trial/7164405                                                                                                                       | calorimetry for calculation of nutritional goals and its effect in ventilator-free days and muscle thickness in septic mechanically ventilated patients | without results          |
| (Not applicable) | <a href="https://ichgcp.net/clinical-trials-registry/NCT02731144">https://ichgcp.net/clinical-trials-registry/NCT02731144</a>                               | Optimized Caloric-protein Nutrition in Septic and Septic Shock Patients                                                                                 | Protocol without results |
| (Not applicable) | <a href="https://classic.clinicaltrials.gov/ct2/show/NCT03249051">https://classic.clinicaltrials.gov/ct2/show/NCT03249051</a>                               | Optimization of Nutritional Therapy in Mechanically Ventilated, Critically Ill Patients                                                                 | Protocol without results |
| Azevedo, JRA     | Clin Nutr Supplements                                                                                                                                       | Optimized Caloric-protein Nutrition in Critically Ill Patients                                                                                          | Congress abstract        |
| (Not applicable) | <a href="https://classic.clinicaltrials.gov/ct2/show/NCT03440593">https://classic.clinicaltrials.gov/ct2/show/NCT03440593</a>                               | Indirect Calorimetry Usage and Effect in Ventilator-free Days and Muscle Thickness in Septic Ventilated Patients                                        | Protocol without results |
| (Not applicable) | <a href="https://trialbulletin.com/lib/entry/ct-03871894">https://trialbulletin.com/lib/entry/ct-03871894</a>                                               | Indirect Calorimeter Based Study in Patients With Liver Cirrhosis                                                                                       | Protocol without results |
| (Not applicable) | <a href="https://classic.clinicaltrials.gov/ct2/show/NCT04479254">https://classic.clinicaltrials.gov/ct2/show/NCT04479254</a>                               | The Impact of IC-Guided Feeding Protocol on Clinical Outcomes in Critically Ill Patients (The IC-Study)                                                 | Protocol without results |
| (Not applicable) | <a href="http://www.who.int/trialsearch/Trial2.aspx?TrialID=ACTRN12615000205538">http://www.who.int/trialsearch/Trial2.aspx?TrialID=ACTRN12615000205538</a> | Determining energy expenditure during critical illness: a comparison of three instruments for indirect calorimetry in mechanically ventilated patients  | Protocol without results |
| Japur, CC        | J Crit Care                                                                                                                                                 | Harris-Benedict equation for critically ill patients: are there differences with indirect calorimetry?                                                  | Wrong study design       |
| Zhi-Yong, R      | Asia Pac J Clin Nutr                                                                                                                                        | Comparison between measured and predicted resting energy                                                                                                | Wrong population         |
| Shi, J           | Zhonghua Wei Zhong Bing Ji Jiu Yi Xue                                                                                                                       | Application value of resting energy monitoring in nutritional support therapy for mechanical ventilation patients                                       | Foreign language         |
| Yang, X          | Chin J Clin Nutri                                                                                                                                           | Comparison of respiratory indirect calorimetry and                                                                                                      | Foreign language         |

|  |  |                                                                                    |  |
|--|--|------------------------------------------------------------------------------------|--|
|  |  | Harris-Benedict coefficient<br>in guiding energy target in<br>patients with sepsis |  |
|--|--|------------------------------------------------------------------------------------|--|

**Supplementary Table S3. Studies excluded from full-text screening**

#### 4. Algorithm for the risk of bias judgment

##### Short-term mortality

|                      | 1.1      | 1.2      | 1.3     | Risk |               |      |     |               |
|----------------------|----------|----------|---------|------|---------------|------|-----|---------------|
| Jeffrey 1990         | Y/PY     | Y/PY     | N/PN/NI | Low  |               |      |     |               |
| Singer 2011          | Y/PY     | Y/PY     | N/PN/NI | Low  |               |      |     |               |
| Anbar 2014           | Y/PY     | Y/PY     | N/PN/NI | Low  |               |      |     |               |
| Allingstrup 2017     | Y/PY     | Y/PY     | N/PN/NI | Low  |               |      |     |               |
| Gonzalez-Granda 2019 | Y/PY     | Y/PY     | N/PN/NI | Low  |               |      |     |               |
| Azevedo 2019         | Y/PY     | Y/PY     | N/PN/NI | Low  |               |      |     |               |
| Singer 2020          | Y/PY     | Y/PY     | N/PN/NI | Low  |               |      |     |               |
|                      | 2.1      | 2.2      | 2.3     | 2.4  | 2.5           | 2.6  | 2.7 | Risk          |
| Jeffrey 1990         | EY/PY/NI | EY/PY/NI | N/PN    |      |               | Y/PY |     | Low           |
| Singer 2011          | EY/PY/NI | EY/PY/NI | N/PN    |      |               | Y/PY |     | Low           |
| Anbar 2014           | EY/PY/NI | EY/PY/NI | Y/PY    | N/PN |               | Y/PY |     | Some concerns |
| Allingstrup 2017     | EY/PY/NI | EY/PY/NI | N/PN    |      |               | Y/PY |     | Low           |
| Gonzalez-Granda 2019 | EY/PY/NI | EY/PY/NI | N/PN    |      |               | Y/PY |     | Low           |
| Azevedo 2019         | EY/PY/NI | EY/PY/NI | Y/PY    | N/PN |               | Y/PY |     | Some concerns |
| Singer 2020          | EY/PY/NI | EY/PY/NI | N/PN    |      |               | Y/PY |     | Low           |
|                      | 3.1      | 3.2      | 3.3     | 3.4  | Risk          |      |     |               |
| Jeffrey 1990         | N/PN/NI  | N/PN     | Y/PY/NI | N/PN | Some concerns |      |     |               |
| Singer 2011          | N/PN/NI  | N/PN     | N/PN    |      | Low           |      |     |               |
| Anbar 2014           | N/PN/NI  | N/PN     | N/PN    |      | Low           |      |     |               |

|                      |         |              |              |               |               |               |
|----------------------|---------|--------------|--------------|---------------|---------------|---------------|
| Allingstrup 2017     | N/PN/NI | N/PN         | N/PN         |               | Low           |               |
| Gonzalez-Granda 2019 | N/PN/NI | N/PN         | N/PN         |               | Low           |               |
| Azevedo 2019         | N/PN/NI | N/PN         | Y/PY/NI      | N/PN          | Some concerns |               |
| Singer 2020          | N/PN/NI | N/PN         | N/PN         |               | Low           |               |
|                      | 4.1     | 4.2          | 4.3          | 4.4           | 4.5           | Risk          |
| Jeffrey 1990         | N/PN/NI | N/PN         | N/PN         |               |               | Low           |
| Singer 2011          | N/PN/NI | N/PN         | N/PN         |               |               | Low           |
| Anbar 2014           | N/PN/NI | N/PN         | N/PN         |               |               | Low           |
| Allingstrup 2017     | N/PN/NI | N/PN         | N/PN         |               |               | Low           |
| Gonzalez-Granda 2019 | N/PN/NI | N/PN         | N/PN         |               |               | Low           |
| Azevedo 2019         | N/PN/NI | N/PN         | Y/PY/NI      | Y/PY/NI       | N/PN          | Some concerns |
| Singer 2020          | N/PN/NI | N/PN         | N/PN         |               |               | Low           |
|                      | 5.1     | 5.2          | 5.3          | Risk          |               |               |
| Jeffrey 1990         | N/PN/NI | Both<br>N/PN | Both<br>N/PN | Some concerns |               |               |
| Singer 2011          | Y/PY    | Both<br>N/PN | Both<br>N/PN | Low           |               |               |
| Anbar 2014           | N/PN/NI | Both<br>N/PN | Both<br>N/PN | Some concerns |               |               |
| Allingstrup 2017     | Y/PY    | Both<br>N/PN | Both<br>N/PN | Low           |               |               |
| Gonzalez-Granda 2019 | Y/PY    | Both<br>N/PN | Both<br>N/PN | Low           |               |               |

|                           |          |              |              |               |               |      |     |               |
|---------------------------|----------|--------------|--------------|---------------|---------------|------|-----|---------------|
| Azevedo 2019              | N/PN/NI  | Both<br>N/PN | Both<br>N/PN | Some concerns |               |      |     |               |
| Singer 2020               | Y/PY     | Both<br>N/PN | Both<br>N/PN | Low           |               |      |     |               |
| <b>Length of ICU stay</b> |          |              |              |               |               |      |     |               |
|                           | 1.1      | 1.2          | 1.3          | Risk          |               |      |     |               |
| Jeffrey 1990              | Y/PY     | Y/PY         | N/PN/NI      | Low           |               |      |     |               |
| Singer 2011               | Y/PY     | Y/PY         | N/PN/NI      | Low           |               |      |     |               |
| Allingstrup 2017          | Y/PY     | Y/PY         | N/PN/NI      | Low           |               |      |     |               |
| Azevedo 2019              | Y/PY     | Y/PY         | N/PN/NI      | Low           |               |      |     |               |
| Gonzalez-Granda 2019      | Y/PY     | Y/PY         | N/PN/NI      | Low           |               |      |     |               |
| Singer 2020               | Y/PY     | Y/PY         | N/PN/NI      | Low           |               |      |     |               |
| Farah 2021                | Y/PY     | Y/PY         | N/PN/NI      | Low           |               |      |     |               |
|                           | 2.1      | 2.2          | 2.3          | 2.4           | 2.5           | 2.6  | 2.7 | Risk          |
| Jeffrey 1990              | EY/PY/NI | EY/PY/NI     | N/PN         |               |               | Y/PY |     | Low           |
| Singer 2011               | EY/PY/NI | EY/PY/NI     | N/PN         |               |               | Y/PY |     | Low           |
| Allingstrup 2017          | EY/PY/NI | EY/PY/NI     | N/PN         |               |               | Y/PY |     | Low           |
| Azevedo 2019              | EY/PY/NI | EY/PY/NI     | Y/PY         | N/PN          |               | Y/PY |     | Some concerns |
| Gonzalez-Granda 2019      | EY/PY/NI | EY/PY/NI     | N/PN         |               |               | Y/PY |     | Low           |
| Singer 2020               | EY/PY/NI | EY/PY/NI     | N/PN         |               |               | Y/PY |     | Low           |
| Farah 2021                | EY/PY/NI | EY/PY/NI     | N/PN         |               |               | Y/PY |     | Low           |
|                           | 3.1      | 3.2          | 3.3          | 3.4           | Risk          |      |     |               |
| Jeffrey 1990              | N/PN/NI  | N/PN         | Y/PY/NI      | N/PN          | Some concerns |      |     |               |



|                      |         |              |              |               |               |               |
|----------------------|---------|--------------|--------------|---------------|---------------|---------------|
| Singer 2011          | N/PN/NI | N/PN         | Y/PY/NI      | N/PN          | Some concerns |               |
| Allingstrup 2017     | N/PN/NI | N/PN         | N/PN         |               | Low           |               |
| Azevedo 2019         | N/PN/NI | N/PN         | Y/PY/NI      | N/PN          | Some concerns |               |
| Gonzalez-Granda 2019 | N/PN/NI | N/PN         | Y/PY/NI      | N/PN          | Some concerns |               |
| Singer 2020          | N/PN/NI | N/PN         | N/PN         |               | Low           |               |
| Farah 2021           | N/PN/NI | N/PN         | N/PN         |               | Low           |               |
|                      | 4.1     | 4.2          | 4.3          | 4.4           | 4.5           | Risk          |
| Jeffrey 1990         | N/PN/NI | N/PN         | Y/PY/NI      | Y/PY/NI       | N/PN          | Some concerns |
| Singer 2011          | N/PN/NI | N/PN         | N/PN         |               |               | Low           |
| Allingstrup 2017     | N/PN/NI | N/PN         | N/PN         |               |               | Low           |
| Azevedo 2019         | N/PN/NI | N/PN         | Y/PY/NI      | Y/PY/NI       | N/PN          | Some concerns |
| Gonzalez-Granda 2019 | N/PN/NI | N/PN         | N/PN         |               |               | Low           |
| Singer 2020          | N/PN/NI | N/PN         | Y/PY/NI      | Y/PY/NI       | N/PN          | Some concerns |
| Farah 2021           | N/PN/NI | N/PN         | N/PN         |               |               | Low           |
|                      | 5.1     | 5.2          | 5.3          | Risk          |               |               |
| Jeffrey 1990         | N/PN/NI | Both<br>N/PN | Both<br>N/PN | Some concerns |               |               |
| Singer 2011          | Y/PY    | Both<br>N/PN | Both<br>N/PN | Low           |               |               |
| Allingstrup 2017     | Y/PY    | Both<br>N/PN | Both<br>N/PN | Low           |               |               |
| Azevedo 2019         | N/PN/NI | Both<br>N/PN | Both<br>N/PN | Some concerns |               |               |

|                                           |          |              |              |               |     |      |     |               |
|-------------------------------------------|----------|--------------|--------------|---------------|-----|------|-----|---------------|
| Gonzalez-Granda 2019                      | N/PN/NI  | Both<br>N/PN | Both<br>N/PN | Some concerns |     |      |     |               |
| Singer 2020                               | Y/PY     | Both<br>N/PN | Both<br>N/PN | Low           |     |      |     |               |
| Farah 2021                                | N/PN/NI  | Both<br>N/PN | Both<br>N/PN | Some concerns |     |      |     |               |
| <b>Duration of mechanical ventilation</b> |          |              |              |               |     |      |     |               |
|                                           | 1.1      | 1.2          | 1.3          | Risk          |     |      |     |               |
| Singer 2011                               | Y/PY     | Y/PY         | N/PN/NI      | Low           |     |      |     |               |
| Landes 2016                               | Y/PY     | Y/PY         | N/PN/NI      | Low           |     |      |     |               |
| Allingstrup 2017                          | Y/PY     | Y/PY         | N/PN/NI      | Low           |     |      |     |               |
| Azevedo 2019                              | Y/PY     | Y/PY         | N/PN/NI      | Low           |     |      |     |               |
| Gonzalez-Granda 2019                      | Y/PY     | Y/PY         | N/PN/NI      | Low           |     |      |     |               |
| Singer 2020                               | Y/PY     | Y/PY         | N/PN/NI      | Low           |     |      |     |               |
| Farah 2021                                | Y/PY     | Y/PY         | N/PN/NI      | Low           |     |      |     |               |
|                                           | 2.1      | 2.2          | 2.3          | 2.4           | 2.5 | 2.6  | 2.7 | Risk          |
| Singer 2011                               | EY/PY/NI | EY/PY/NI     | N/PN         |               |     | Y/PY |     | Low           |
| Landes 2016                               | EY/PY/NI | EY/PY/NI     | N/PN         |               |     | Y/PY |     | Low           |
| Allingstrup 2017                          | EY/PY/NI | EY/PY/NI     | N/PN         |               |     | Y/PY |     | Low           |
| Azevedo 2019                              | EY/PY/NI | EY/PY/NI     | Y/PY         | N/PN          |     | Y/PY |     | Some concerns |
| Gonzalez-Granda 2019                      | EY/PY/NI | EY/PY/NI     | N/PN         |               |     | Y/PY |     | Low           |
| Singer 2020                               | EY/PY/NI | EY/PY/NI     | N/PN         |               |     | Y/PY |     | Low           |
| Farah 2021                                | EY/PY/NI | EY/PY/NI     | N/PN         |               |     | Y/PY |     | Low           |

|                      | 3.1     | 3.2          | 3.3          | 3.4     | Risk          |               |
|----------------------|---------|--------------|--------------|---------|---------------|---------------|
| Singer 2011          | N/PN/NI | N/PN         | Y/PY/NI      | N/PN    | Some concerns |               |
| Landes 2016          | N/PN/NI | N/PN         | N/PN         |         | Low           |               |
| Allingstrup 2017     | N/PN/NI | N/PN         | N/PN         |         | Low           |               |
| Azevedo 2019         | N/PN/NI | N/PN         | Y/PY/NI      | N/PN    | Some concerns |               |
| Gonzalez-Granda 2019 | N/PN/NI | N/PN         | N/PN         |         | Low           |               |
| Singer 2020          | N/PN/NI | N/PN         | N/PN         |         | Low           |               |
| Farah 2021           | N/PN/NI | N/PN         | N/PN         |         | Low           |               |
|                      | 4.1     | 4.2          | 4.3          | 4.4     | 4.5           | Risk          |
| Singer 2011          | N/PN/NI | N/PN         | N/PN         |         |               | Low           |
| Landes 2016          | N/PN/NI | N/PN         | N/PN         |         |               | Low           |
| Allingstrup 2017     | N/PN/NI | N/PN         | N/PN         |         |               | Low           |
| Azevedo 2019         | N/PN/NI | N/PN         | Y/PY/NI      | Y/PY/NI | N/PN          | Some concerns |
| Gonzalez-Granda 2019 | N/PN/NI | N/PN         | Y/PY/NI      | Y/PY/NI | N/PN          | Some concerns |
| Singer 2020          | N/PN/NI | N/PN         | Y/PY/NI      | Y/PY/NI | N/PN          | Some concerns |
| Farah 2021           | N/PN/NI | N/PN         | N/PN         |         |               | Low           |
|                      | 5.1     | 5.2          | 5.3          | Risk    |               |               |
| Singer 2011          | Y/PY    | Both<br>N/PN | Both<br>N/PN | Low     |               |               |
| Landes 2016          | Y/PY    | Both<br>N/PN | Both<br>N/PN | Low     |               |               |
| Allingstrup 2017     | Y/PY    | Both<br>N/PN | Both<br>N/PN | Low     |               |               |

|                       |          |              |              |               |               |      |     |               |
|-----------------------|----------|--------------|--------------|---------------|---------------|------|-----|---------------|
| Azevedo 2019          | N/PN/NI  | Both<br>N/PN | Both<br>N/PN | Some concerns |               |      |     |               |
| Gonzalez-Granda 2019  | Y/PY     | Both<br>N/PN | Both<br>N/PN | Low           |               |      |     |               |
| Singer 2020           | Y/PY     | Both<br>N/PN | Both<br>N/PN | Low           |               |      |     |               |
| Farah 2021            | N/PN/NI  | Both<br>N/PN | Both<br>N/PN | Some concerns |               |      |     |               |
| <b>All infections</b> |          |              |              |               |               |      |     |               |
|                       | 1.1      | 1.2          | 1.3          | Risk          |               |      |     |               |
| Singer 2011           | Y/PY     | Y/PY         | N/PN/NI      | Low           |               |      |     |               |
| Anbar 2014            | Y/PY     | Y/PY         | N/PN/NI      | Low           |               |      |     |               |
| Allingstrup 2017      | Y/PY     | Y/PY         | N/PN/NI      | Low           |               |      |     |               |
| Singer 2020           | Y/PY     | Y/PY         | N/PN/NI      | Low           |               |      |     |               |
|                       | 2.1      | 2.2          | 2.3          | 2.4           | 2.5           | 2.6  | 2.7 | Risk          |
| Singer 2011           | EY/PY/NI | EY/PY/NI     | N/PN         |               |               | Y/PY |     | Low           |
| Anbar 2014            | EY/PY/NI | EY/PY/NI     | Y/PY         | N/PN          |               | Y/PY |     | Some concerns |
| Allingstrup 2017      | EY/PY/NI | EY/PY/NI     | N/PN         |               |               | Y/PY |     | Low           |
| Singer 2020           | EY/PY/NI | EY/PY/NI     | N/PN         |               |               | Y/PY |     | Low           |
|                       | 3.1      | 3.2          | 3.3          | 3.4           | Risk          |      |     |               |
| Singer 2011           | N/PN/NI  | N/PN         | Y/PY/NI      | N/PN          | Some concerns |      |     |               |
| Anbar 2014            | N/PN/NI  | N/PN         | N/PN         |               | Low           |      |     |               |
| Allingstrup 2017      | N/PN/NI  | N/PN         | N/PN         |               | Low           |      |     |               |

|                                        |          |              |              |               |      |               |
|----------------------------------------|----------|--------------|--------------|---------------|------|---------------|
| Singer 2020                            | N/PN/NI  | N/PN         | N/PN         |               | Low  |               |
|                                        | 4.1      | 4.2          | 4.3          | 4.4           | 4.5  | Risk          |
| Singer 2011                            | N/PN/NI  | N/PN         | N/PN         |               |      | Low           |
| Anbar 2014                             | N/PN/NI  | N/PN         | N/PN         |               |      | Low           |
| Allingstrup 2017                       | N/PN/NI  | N/PN         | N/PN         |               |      | Low           |
| Singer 2020                            | N/PN/NI  | N/PN         | Y/PY/NI      | Y/PY/NI       | N/PN | Some concerns |
|                                        | 5.1      | 5.2          | 5.3          | Risk          |      |               |
| Singer 2011                            | Y/PY     | Both<br>N/PN | Both<br>N/PN | Low           |      |               |
| Anbar 2014                             | N/PN/NI  | Both<br>N/PN | Both<br>N/PN | Some concerns |      |               |
| Allingstrup 2017                       | Y/PY     | Both<br>N/PN | Both<br>N/PN | Low           |      |               |
| Singer 2020                            | Y/PY     | Both<br>N/PN | Both<br>N/PN | Low           |      |               |
| <b>Ventilator-associated pneumonia</b> |          |              |              |               |      |               |
|                                        | 1.1      | 1.2          | 1.3          | Risk          |      |               |
| Singer 2011                            | Y/PY     | Y/PY         | N/PN/NI      | Low           |      |               |
| Anbar 2014                             | Y/PY     | Y/PY         | N/PN/NI      | Low           |      |               |
| Allingstrup 2017                       | Y/PY     | Y/PY         | N/PN/NI      | Low           |      |               |
| Singer 2020                            | Y/PY     | Y/PY         | N/PN/NI      | Low           |      |               |
|                                        | 2.1      | 2.2          | 2.3          | 2.4           | 2.5  | 2.6 2.7 Risk  |
| Singer 2011                            | EY/PY/NI | EY/PY/NI     | N/PN         |               |      | Y/PY Low      |

|                    |          |              |              |         |               |               |               |
|--------------------|----------|--------------|--------------|---------|---------------|---------------|---------------|
| Anbar 2014         | EY/PY/NI | EY/PY/NI     | Y/PY         | N/PN    |               | Y/PY          | Some concerns |
| Allingstrup 2017   | EY/PY/NI | EY/PY/NI     | N/PN         |         |               | Y/PY          | Low           |
| Singer 2020        | EY/PY/NI | EY/PY/NI     | N/PN         |         |               | Y/PY          | Low           |
|                    | 3.1      | 3.2          | 3.3          | 3.4     | Risk          |               |               |
| Singer 2011        | N/PN/NI  | N/PN         | Y/PY/NI      | N/PN    |               | Some concerns |               |
| Anbar 2014         | N/PN/NI  | N/PN         | N/PN         |         |               | Low           |               |
| Allingstrup 2017   | N/PN/NI  | N/PN         | N/PN         |         |               | Low           |               |
| Singer 2020        | N/PN/NI  | N/PN         | N/PN         |         |               | Low           |               |
|                    | 4.1      | 4.2          | 4.3          | 4.4     | 4.5           | Risk          |               |
| Singer 2011        | N/PN/NI  | N/PN         | N/PN         |         |               | Low           |               |
| Anbar 2014         | N/PN/NI  | N/PN         | N/PN         |         |               | Low           |               |
| Allingstrup 2017   | N/PN/NI  | N/PN         | N/PN         |         |               | Low           |               |
| Singer 2020        | N/PN/NI  | N/PN         | Y/PY/NI      | Y/PY/NI | N/PN          | Some concerns |               |
|                    | 5.1      | 5.2          | 5.3          | Risk    |               |               |               |
| Singer 2011        | Y/PY     | Both<br>N/PN | Both<br>N/PN |         | Low           |               |               |
| Anbar 2014         | N/PN/NI  | Both<br>N/PN | Both<br>N/PN |         | Some concerns |               |               |
| Allingstrup 2017   | Y/PY     | Both<br>N/PN | Both<br>N/PN |         | Low           |               |               |
| Singer 2020        | Y/PY     | Both<br>N/PN | Both<br>N/PN |         | Low           |               |               |
| physical functions |          |              |              |         |               |               |               |

|                              |          |              |              |               |               |               |     |               |
|------------------------------|----------|--------------|--------------|---------------|---------------|---------------|-----|---------------|
| (physical component summary) |          |              |              |               |               |               |     |               |
|                              | 1.1      | 1.2          | 1.3          | Risk          |               |               |     |               |
| Azevedo 2019                 | Y/PY     | Y/PY         | N/PN/NI      | Low           |               |               |     |               |
| Allingstrup 2017             | Y/PY     | Y/PY         | N/PN/NI      | Low           |               |               |     |               |
|                              | 2.1      | 2.2          | 2.3          | 2.4           | 2.5           | 2.6           | 2.7 | Risk          |
| Azevedo 2019                 | EY/PY/NI | EY/PY/NI     | Y/PY         | N/PN          |               | Y/PY          |     | Some concerns |
| Allingstrup 2017             | EY/PY/NI | EY/PY/NI     | N/PN         |               |               | Y/PY          |     | Low           |
|                              | 3.1      | 3.2          | 3.3          | 3.4           | Risk          |               |     |               |
| Azevedo 2019                 | N/PN/NI  | N/PN         | Y/PY/NI      | N/PN          | Some concerns |               |     |               |
| Allingstrup 2017             | N/PN/NI  | N/PN         | N/PN         |               | Low           |               |     |               |
|                              | 4.1      | 4.2          | 4.3          | 4.4           | 4.5           | Risk          |     |               |
| Azevedo 2019                 | N/PN/NI  | N/PN         | Y/PY/NI      | Y/PY/NI       | N/PN          | Some concerns |     |               |
| Allingstrup 2017             | N/PN/NI  | N/PN         | N/PN         |               |               | Low           |     |               |
|                              | 5.1      | 5.2          | 5.3          | Risk          |               |               |     |               |
| Azevedo 2019                 | N/PN/NI  | Both<br>N/PN | Both<br>N/PN | Some concerns |               |               |     |               |
| Allingstrup 2017             | Y/PY     | Both<br>N/PN | Both<br>N/PN | Low           |               |               |     |               |
| Adverse events (kidney)      |          |              |              |               |               |               |     |               |
|                              | 1.1      | 1.2          | 1.3          | Risk          |               |               |     |               |

|                               |          |              |              |         |               |               |     |      |
|-------------------------------|----------|--------------|--------------|---------|---------------|---------------|-----|------|
| Singer 2011                   | Y/PY/NI  | Y/PY         | N/PN/NI      | Low     |               |               |     |      |
| Singer 2020                   | Y/PY/NI  | Y/PY         | N/PN/NI      | Low     |               |               |     |      |
|                               | 2.1      | 2.2          | 2.3          | 2.4     | 2.5           | 2.6           | 2.7 | Risk |
| Singer 2011                   | EY/PY/NI | EY/PY/NI     | N/PN         |         |               | Y/PY          |     | Low  |
| Singer 2020                   | EY/PY/NI | EY/PY/NI     | N/PN         |         |               | Y/PY          |     | Low  |
|                               | 3.1      | 3.2          | 3.3          | 3.4     | Risk          |               |     |      |
| Singer 2011                   | N/PN/NI  | N/PN         | Y/PY/NI      | N/PN    | Some concerns |               |     |      |
| Singer 2020                   | N/PN/NI  | N/PN         | N/PN         |         | Low           |               |     |      |
|                               | 4.1      | 4.2          | 4.3          | 4.4     | 4.5           | Risk          |     |      |
| Singer 2011                   | N/PN/NI  | N/PN         | N/PN         |         |               | Low           |     |      |
| Singer 2020                   | N/PN/NI  | N/PN         | Y/PY/NI      | Y/PY/NI | N/PN          | Some concerns |     |      |
|                               | 5.1      | 5.2          | 5.3          | Risk    |               |               |     |      |
| Singer 2011                   | Y/PY     | Both<br>N/PN | Both<br>N/PN | Low     |               |               |     |      |
| Singer 2020                   | Y/PY     | Both<br>N/PN | Both<br>N/PN | Low     |               |               |     |      |
| <b>Adverse events (liver)</b> |          |              |              |         |               |               |     |      |
|                               | 1.1      | 1.2          | 1.3          | Risk    |               |               |     |      |
| Singer 2011                   | Y/PY/NI  | Y/PY         | N/PN/NI      | Low     |               |               |     |      |
| Singer 2020                   | Y/PY/NI  | Y/PY         | N/PN/NI      | Low     |               |               |     |      |
|                               | 2.1      | 2.2          | 2.3          | 2.4     | 2.5           | 2.6           | 2.7 | Risk |
| Singer 2011                   | EY/PY/NI | EY/PY/NI     | N/PN         |         |               | Y/PY          |     | Low  |
| Singer 2020                   | EY/PY/NI | EY/PY/NI     | N/PN         |         |               | Y/PY          |     | Low  |



|             | 3.1     | 3.2          | 3.3          | 3.4     | Risk          |               |
|-------------|---------|--------------|--------------|---------|---------------|---------------|
| Singer 2011 | N/PN/NI | N/PN         | Y/PY/NI      | N/PN    | Some concerns |               |
| Singer 2020 | N/PN/NI | N/PN         | N/PN         |         | Low           |               |
|             | 4.1     | 4.2          | 4.3          | 4.4     | 4.5           | Risk          |
| Singer 2011 | N/PN/NI | N/PN         | N/PN         |         |               | Low           |
| Singer 2020 | N/PN/NI | N/PN         | Y/PY/NI      | Y/PY/NI | N/PN          | Some concerns |
|             | 5.1     | 5.2          | 5.3          | Risk    |               |               |
| Singer 2011 | Y/PY    | Both<br>N/PN | Both<br>N/PN | Low     |               |               |
| Singer 2020 | Y/PY    | Both<br>N/PN | Both<br>N/PN | Low     |               |               |

**Supplementary Table S4. Algorithm for the risk of bias judgment**

## 5. Risk-of-bias summary and graph

### A. Short-term mortality

A-1. Risk-of-bias summary: Review authors' judgements about each risk of bias item for each included study.

|                      | Risk of bias domains |    |    |    |    |         |
|----------------------|----------------------|----|----|----|----|---------|
|                      | D1                   | D2 | D3 | D4 | D5 | Overall |
| Study                |                      |    |    |    |    |         |
| Jeffrey 1990         |                      |    |    |    |    |         |
| Singer 2011          |                      |    |    |    |    |         |
| Anbar 2014           |                      |    |    |    |    |         |
| Allingstrup 2017     |                      |    |    |    |    |         |
| Gonzalez-Granda 2019 |                      |    |    |    |    |         |
| Azevedo 2019         |                      |    |    |    |    |         |
| Singer 2020          |                      |    |    |    |    |         |

Domains:  
D1: Bias arising from the randomization process.  
D2: Bias due to deviations from intended intervention.  
D3: Bias due to missing outcome data.  
D4: Bias in measurement of the outcome.  
D5: Bias in selection of the reported result.

Judgement  
 Some concerns  
 Low

A-2. Risk-of-bias graph: Review authors' judgements about each risk of bias item presented as percentages across all included studies.

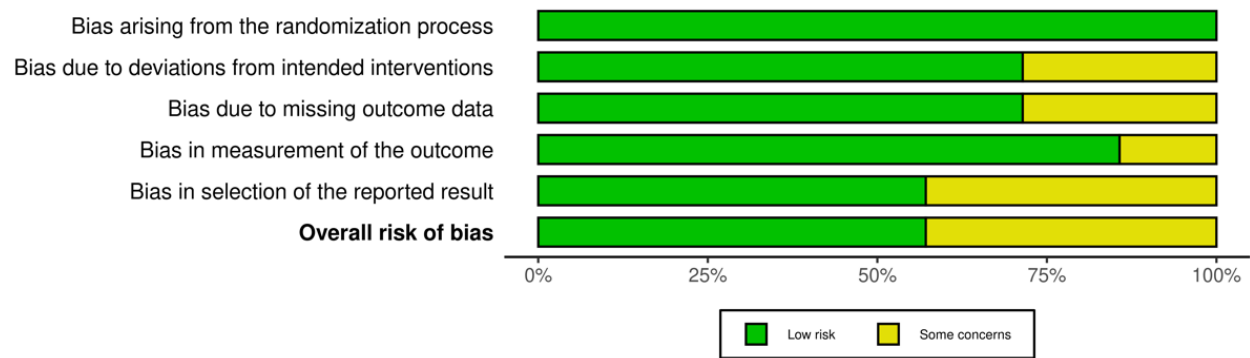

### A-3. Forest plot of comparison: Mortality

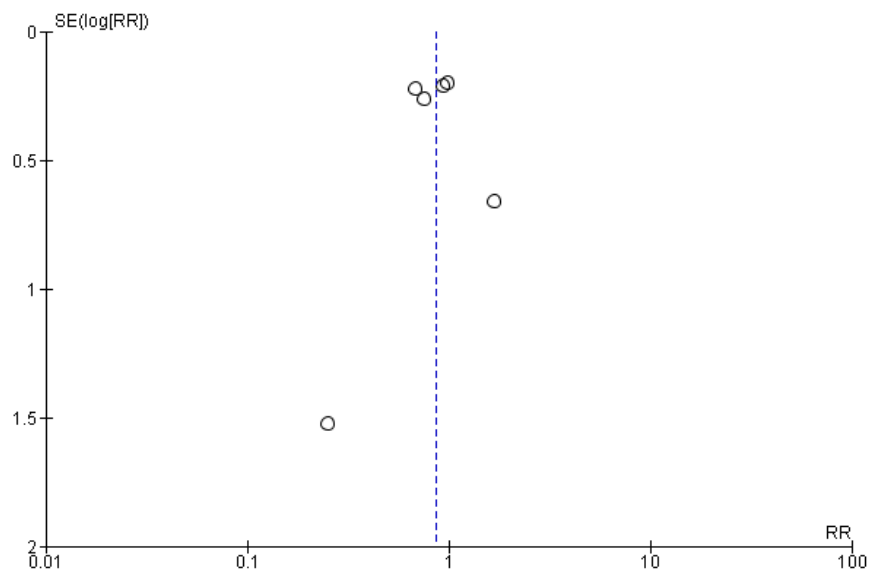

### B. Length of ICU stay

B-1. Risk-of-bias summary: Review authors' judgements about each risk of bias item for each included study.

|       |                      | Risk of bias domains                                                                                                                                                                                                                                                                   |    |    |    |    |                                                                 |
|-------|----------------------|----------------------------------------------------------------------------------------------------------------------------------------------------------------------------------------------------------------------------------------------------------------------------------------|----|----|----|----|-----------------------------------------------------------------|
|       |                      | D1                                                                                                                                                                                                                                                                                     | D2 | D3 | D4 | D5 | Overall                                                         |
| Study | Jeffrey 1990         |                                                                                                                                                                                                                                                                                        |    |    |    |    |                                                                 |
|       | Singer 2011          |                                                                                                                                                                                                                                                                                        |    |    |    |    |                                                                 |
|       | Allingstrup 2017     |                                                                                                                                                                                                                                                                                        |    |    |    |    |                                                                 |
|       | Azevedo 2019         |                                                                                                                                                                                                                                                                                        |    |    |    |    |                                                                 |
|       | Gonzalez-Granda 2019 |                                                                                                                                                                                                                                                                                        |    |    |    |    |                                                                 |
|       | Singer 2020          |                                                                                                                                                                                                                                                                                        |    |    |    |    |                                                                 |
|       | Farah 2021           |                                                                                                                                                                                                                                                                                        |    |    |    |    |                                                                 |
|       |                      | <p>Domains:</p> <p>D1: Bias arising from the randomization process.</p> <p>D2: Bias due to deviations from intended intervention.</p> <p>D3: Bias due to missing outcome data.</p> <p>D4: Bias in measurement of the outcome.</p> <p>D5: Bias in selection of the reported result.</p> |    |    |    |    | <p>Judgement</p> <p> High</p> <p> Some concerns</p> <p> Low</p> |

B-2. Risk-of-bias graph: Review authors' judgements about each risk of bias item presented as percentages across all included studies.

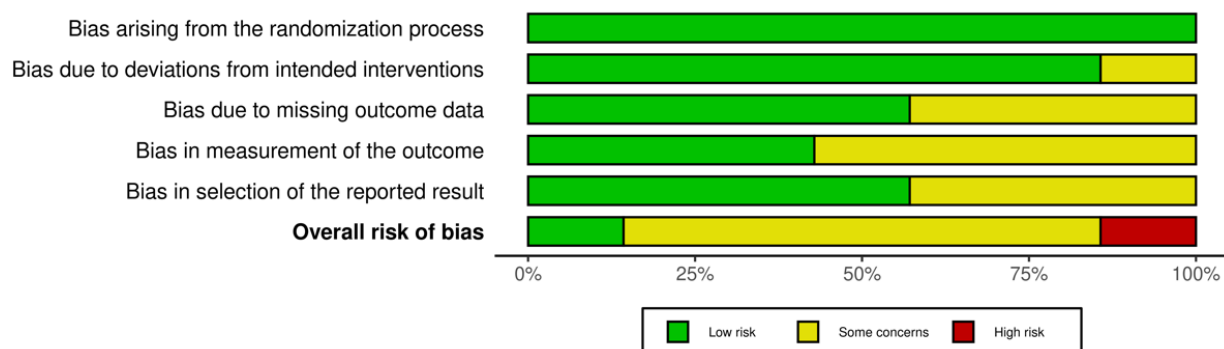

### B-3. Forest plot of comparison: Length of ICU stay

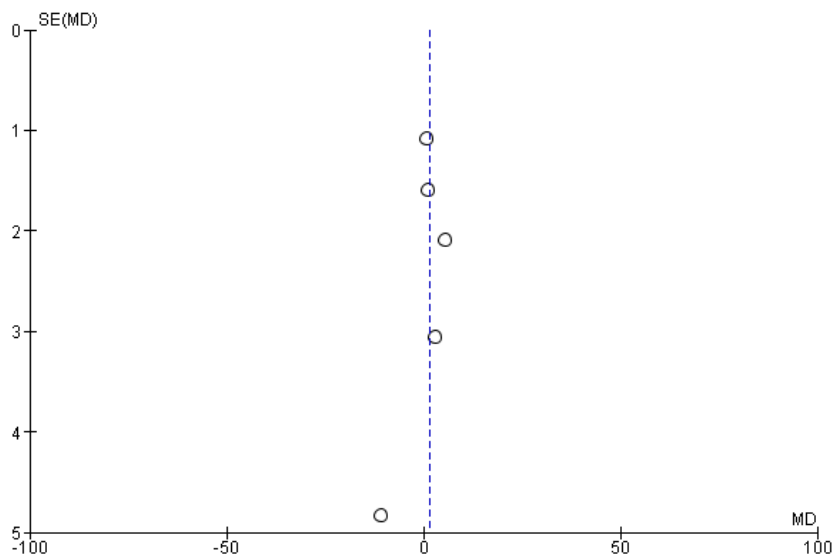

### C. Duration of mechanical ventilation

C-1. Risk-of-bias summary: Review authors' judgements about each risk of bias item for each included study.

|       |                      | Risk of bias domains                                                                |                                                                                     |                                                                                     |                                                                                       |                                                                                       |                                                                                       |
|-------|----------------------|-------------------------------------------------------------------------------------|-------------------------------------------------------------------------------------|-------------------------------------------------------------------------------------|---------------------------------------------------------------------------------------|---------------------------------------------------------------------------------------|---------------------------------------------------------------------------------------|
|       |                      | D1                                                                                  | D2                                                                                  | D3                                                                                  | D4                                                                                    | D5                                                                                    | Overall                                                                               |
| Study | Singer 2011          |  |  |  |  |  |  |
|       | Landes 2016          |  |  |  |  |  |  |
|       | Allingstrup 2017     |  |  |  |  |  |  |
|       | Azevedo 2019         |  |  |  |  |  |  |
|       | Gonzalez-Granda 2019 |  |  |  |  |  |  |
|       | Singer 2020          |  |  |  |  |  |  |
|       | Farah 2021           |  |  |  |  |  |  |

Domains:

D1: Bias arising from the randomization process.

D2: Bias due to deviations from intended intervention.

D3: Bias due to missing outcome data.

D4: Bias in measurement of the outcome.

D5: Bias in selection of the reported result.

Judgement

- Some concerns

+ Low

C-2. Risk-of-bias graph: Review authors' judgements about each risk of bias item presented as percentages across all included studies.

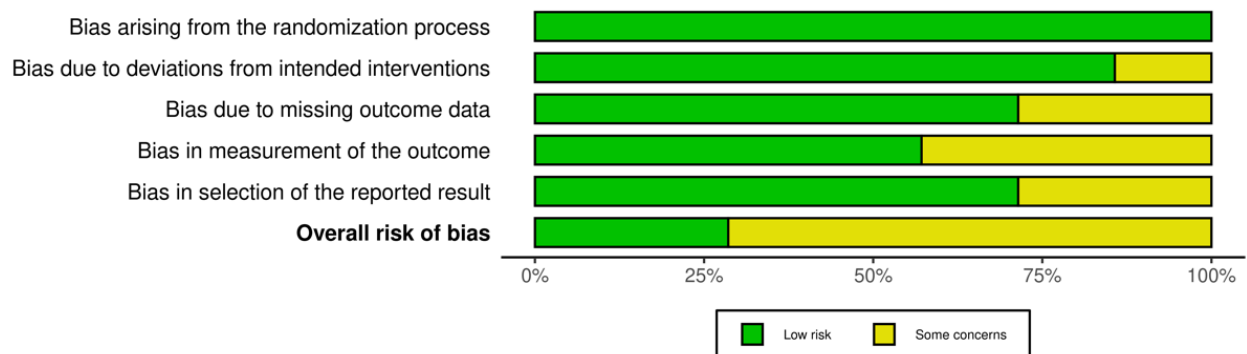

C-3. Forest plot of comparison: Duration of mechanical ventilation

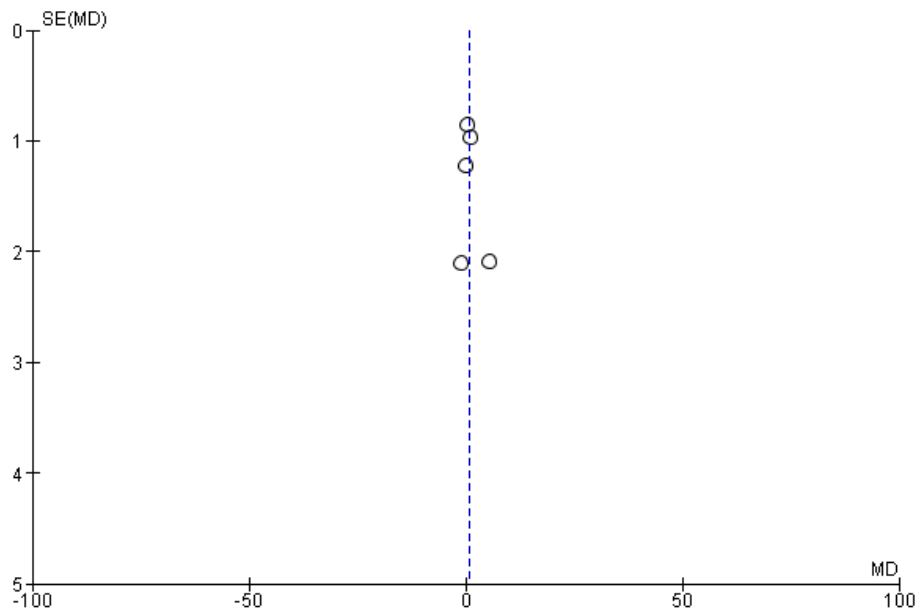

## D. All infections

D-1. Risk-of-bias summary: Review authors' judgements about each risk of bias item for each included study.

|       |                  | Risk of bias domains                                                              |                                                                                   |                                                                                   |                                                                                     |                                                                                     |                                                                                     |
|-------|------------------|-----------------------------------------------------------------------------------|-----------------------------------------------------------------------------------|-----------------------------------------------------------------------------------|-------------------------------------------------------------------------------------|-------------------------------------------------------------------------------------|-------------------------------------------------------------------------------------|
|       |                  | D1                                                                                | D2                                                                                | D3                                                                                | D4                                                                                  | D5                                                                                  | Overall                                                                             |
| Study | Singer 2011      |  |  |  |  |  |  |
|       | Anbar 2014       |  |  |  |  |  |  |
|       | Allingstrup 2017 |  |  |  |  |  |  |
|       | Singer 2020      |  |  |  |  |  |  |

Domains:

D1: Bias arising from the randomization process.

D2: Bias due to deviations from intended intervention.

D3: Bias due to missing outcome data.

D4: Bias in measurement of the outcome.

D5: Bias in selection of the reported result.

Judgement

 Some concerns

 Low

D-2. Risk-of-bias graph: Review authors' judgements about each risk of bias item presented as percentages across all included studies.

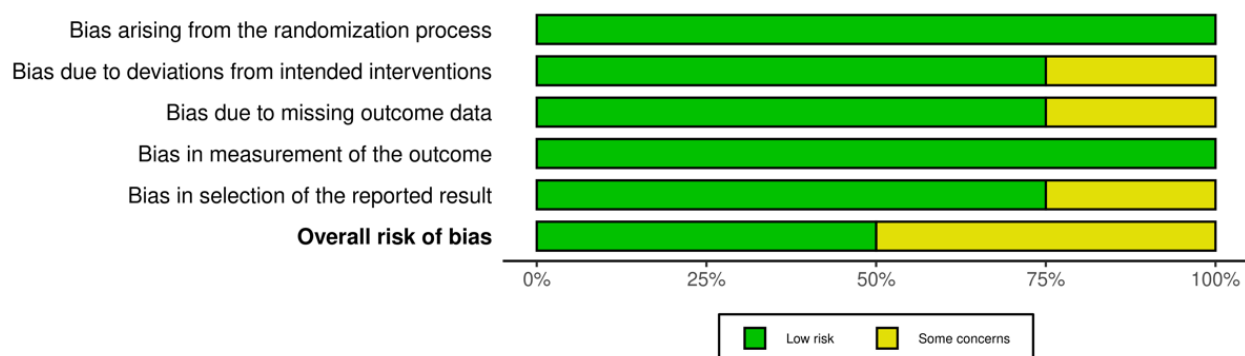

### D-3. Forest plot of comparison: All infections

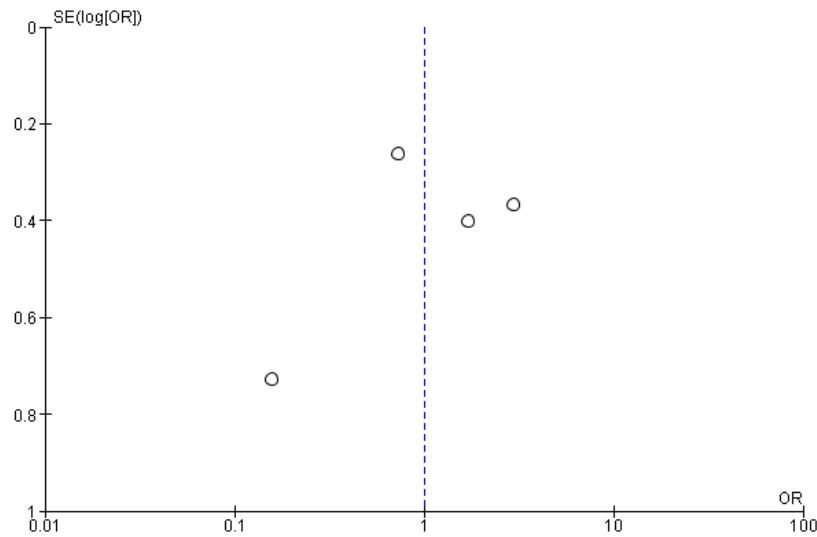

### E. Ventilator-associated pneumonia

E-1. Risk-of-bias summary: Review authors' judgements about each risk of bias item for each included study.

|       |                  | Risk of bias domains                                                                |                                                                                     |                                                                                     |                                                                                      |                                                                                       |                                                                                       |
|-------|------------------|-------------------------------------------------------------------------------------|-------------------------------------------------------------------------------------|-------------------------------------------------------------------------------------|--------------------------------------------------------------------------------------|---------------------------------------------------------------------------------------|---------------------------------------------------------------------------------------|
|       |                  | D1                                                                                  | D2                                                                                  | D3                                                                                  | D4                                                                                   | D5                                                                                    | Overall                                                                               |
| Study | Singer 2011      |  |  |  |  |  |  |
|       | Anbar 2014       |  |  |  |  |  |  |
|       | Allingstrup 2017 |  |  |  |  |  |  |
|       | Singer 2020      |  |  |  |  |  |  |

Domains:

D1: Bias arising from the randomization process.  
D2: Bias due to deviations from intended intervention.  
D3: Bias due to missing outcome data.  
D4: Bias in measurement of the outcome.  
D5: Bias in selection of the reported result.

Judgement

- Some concerns  
+ Low



E-2. Risk-of-bias graph: Review authors' judgements about each risk of bias item presented as percentages across all included studies.

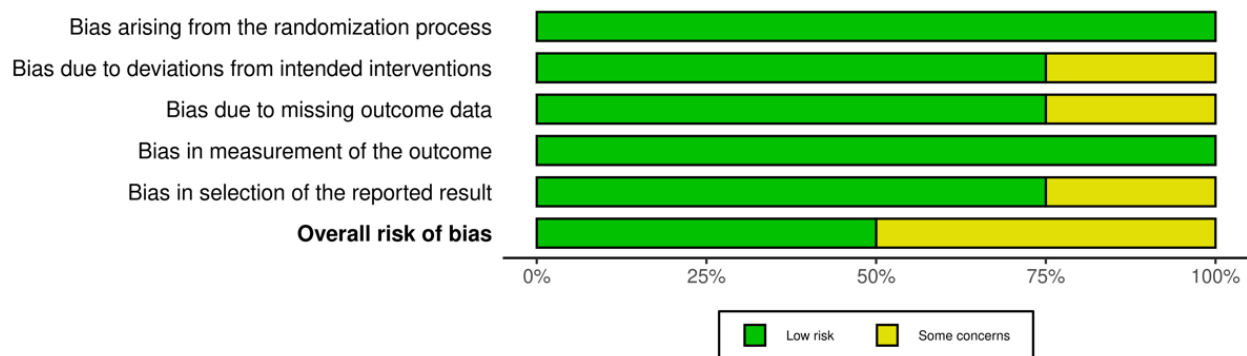

E-3. Forest plot of comparison: Ventilator-associated pneumonia

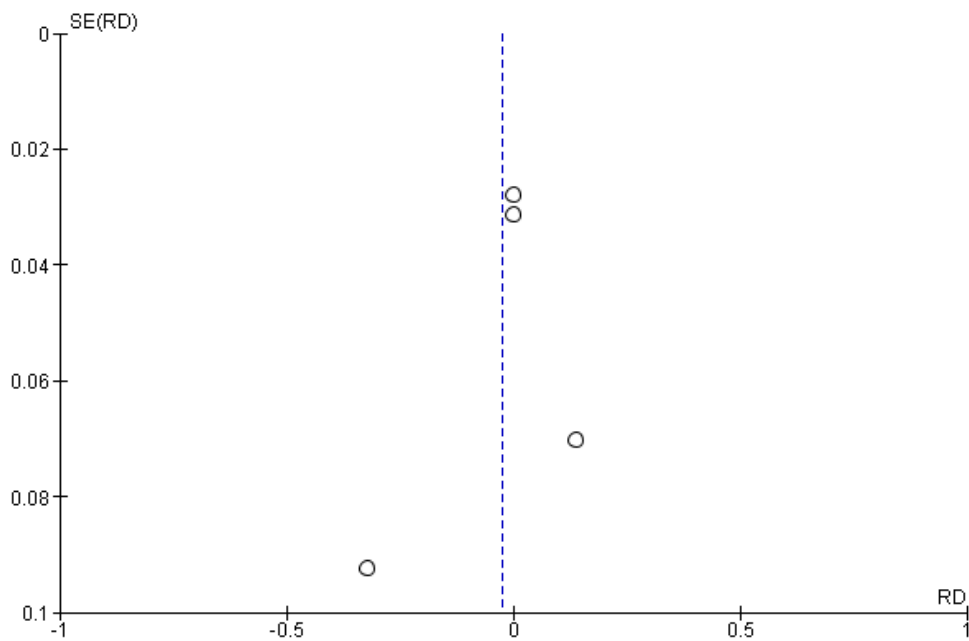

## F. Physical functions (physical component summary)

F-1. Risk-of-bias summary: Review authors' judgements about each risk of bias item for each included study.

|       |                  | Risk of bias domains |    |    |    |    |         |
|-------|------------------|----------------------|----|----|----|----|---------|
|       |                  | D1                   | D2 | D3 | D4 | D5 | Overall |
| Study | Azevedo 2019     |                      |    |    |    |    |         |
|       | Allingstrup 2017 |                      |    |    |    |    |         |

Domains:

D1: Bias arising from the randomization process.

D2: Bias due to deviations from intended intervention.

D3: Bias due to missing outcome data.

D4: Bias in measurement of the outcome.

D5: Bias in selection of the reported result.

Judgement

Some concerns

Low

F-2. Risk-of-bias graph: Review authors' judgements about each risk of bias item presented as percentages across all included studies.

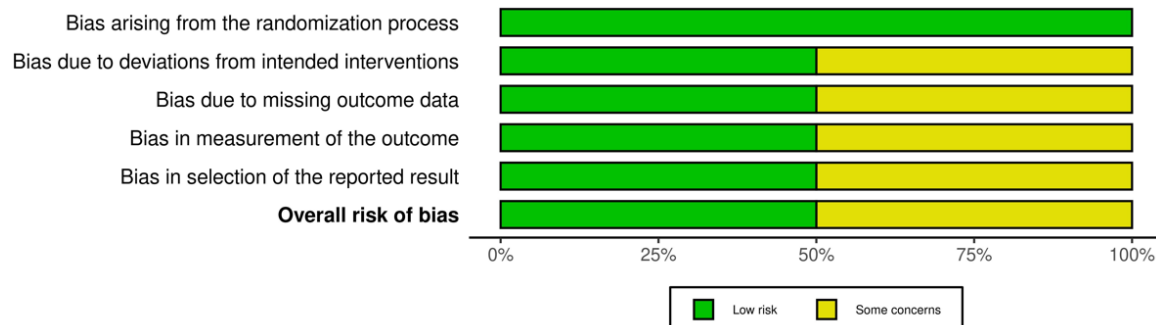

F-3. Forest plot of comparison: Physical functions (physical component summary)

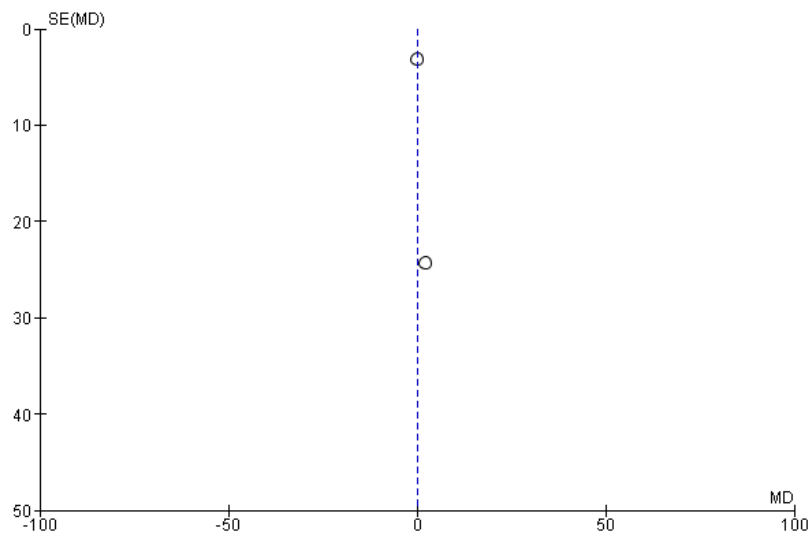

### G. Adverse events (kidney)

G-1. Risk-of-bias summary: Review authors' judgements about each risk of bias item for each included study.

|       |             | Risk of bias domains                                                                |                                                                                     |                                                                                     |                                                                                      |                                                                                       |                                                                                       |
|-------|-------------|-------------------------------------------------------------------------------------|-------------------------------------------------------------------------------------|-------------------------------------------------------------------------------------|--------------------------------------------------------------------------------------|---------------------------------------------------------------------------------------|---------------------------------------------------------------------------------------|
|       |             | D1                                                                                  | D2                                                                                  | D3                                                                                  | D4                                                                                   | D5                                                                                    | Overall                                                                               |
| Study | Singer 2011 |  |  |  |  |  |  |
|       | Singer 2020 |  |  |  |  |  |  |

Domains:  
D1: Bias arising from the randomization process.  
D2: Bias due to deviations from intended intervention.  
D3: Bias due to missing outcome data.  
D4: Bias in measurement of the outcome.  
D5: Bias in selection of the reported result.

Judgement  
 Some concerns  
 Low

G-2. Risk-of-bias graph: Review authors' judgements about each risk of bias item presented as percentages across all included studies.

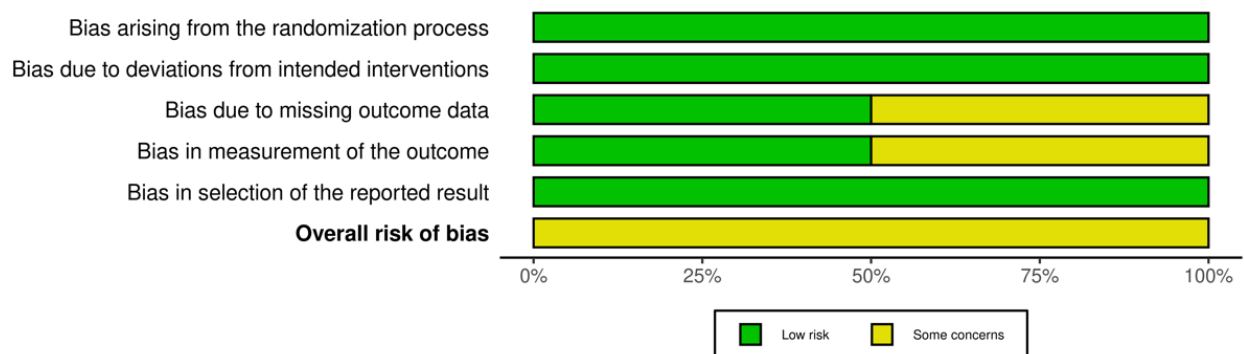

G-3. Forest plot of comparison: Adverse events (kidney)

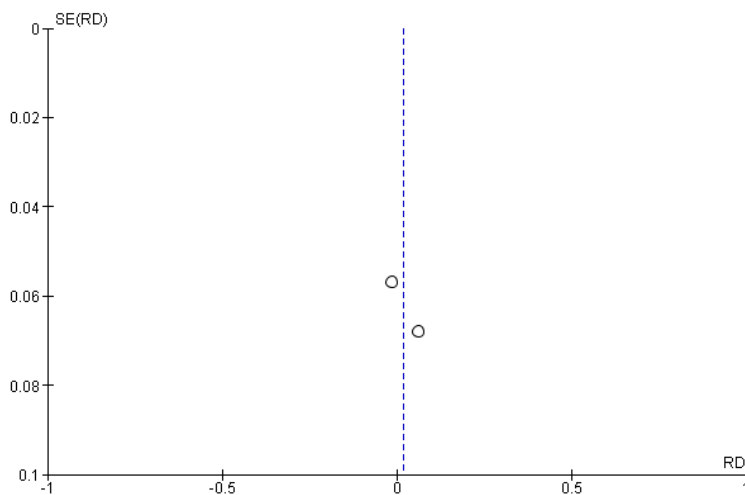

## H. Adverse events (liver)

H-1. Risk-of-bias summary: Review authors' judgements about each risk of bias item for each included study.

|       |             | Risk of bias domains                                                                |                                                                                     |                                                                                     |                                                                                     |                                                                                     |                                                                                       |
|-------|-------------|-------------------------------------------------------------------------------------|-------------------------------------------------------------------------------------|-------------------------------------------------------------------------------------|-------------------------------------------------------------------------------------|-------------------------------------------------------------------------------------|---------------------------------------------------------------------------------------|
|       |             | D1                                                                                  | D2                                                                                  | D3                                                                                  | D4                                                                                  | D5                                                                                  | Overall                                                                               |
| Study | Singer 2011 |  |  |  |  |  |  |
|       | Singer 2020 |  |  |  |  |  |  |

Domains:

D1: Bias arising from the randomization process.

D2: Bias due to deviations from intended intervention.

D3: Bias due to missing outcome data.

D4: Bias in measurement of the outcome.

D5: Bias in selection of the reported result.

Judgement

 Some concerns

 Low

H-2. Risk-of-bias graph: Review authors' judgements about each risk of bias item presented as percentages across all included studies.

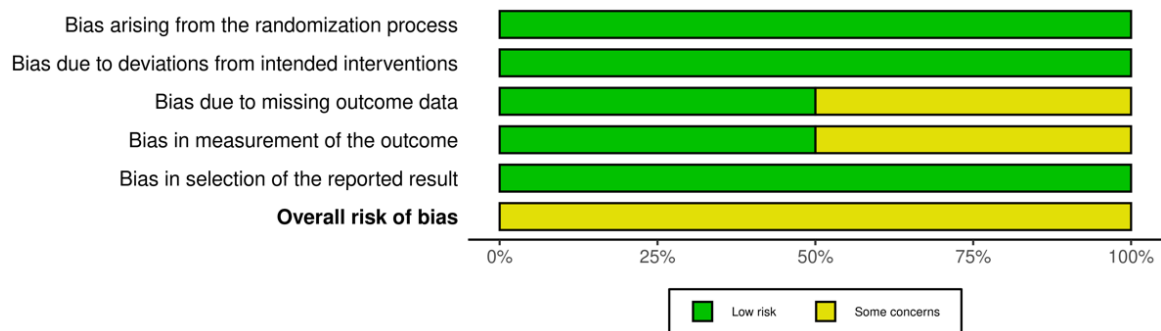

H-3. Forest plot of comparison: Adverse events (liver)

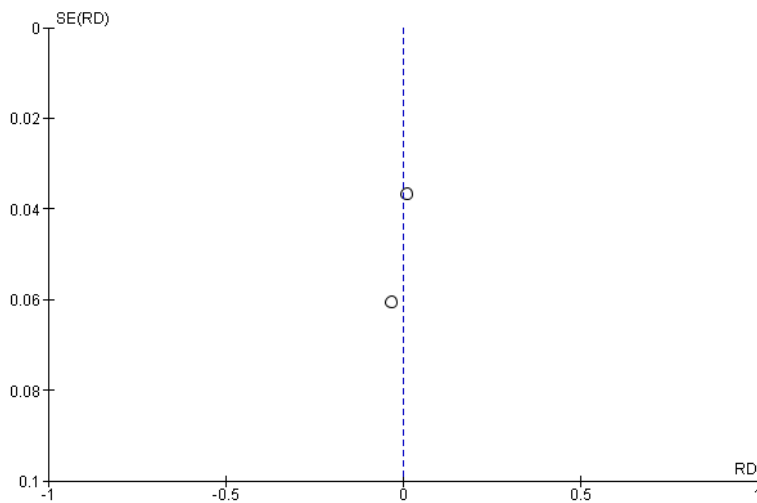

**Supplementary Figure S1. Risk-of-bias summary and graph**

## 6. Forest plot for outcomes.

### 2-1 Short-term mortality

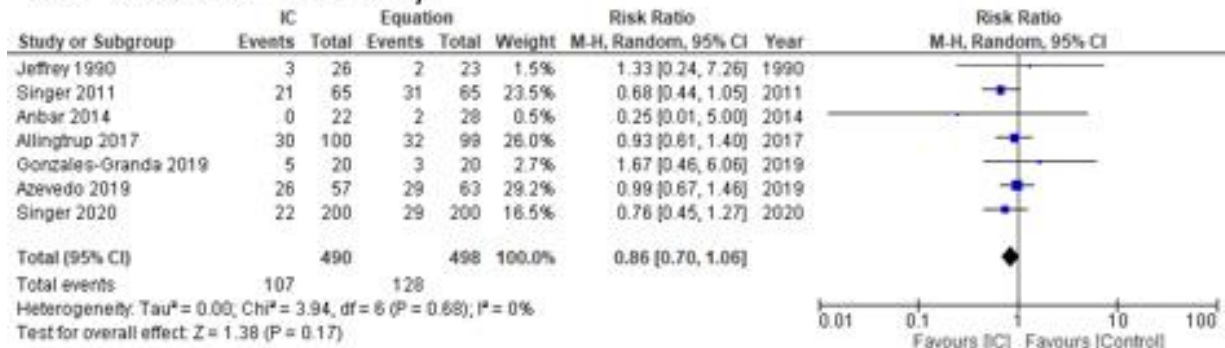

### 2-2 Length of ICU stay

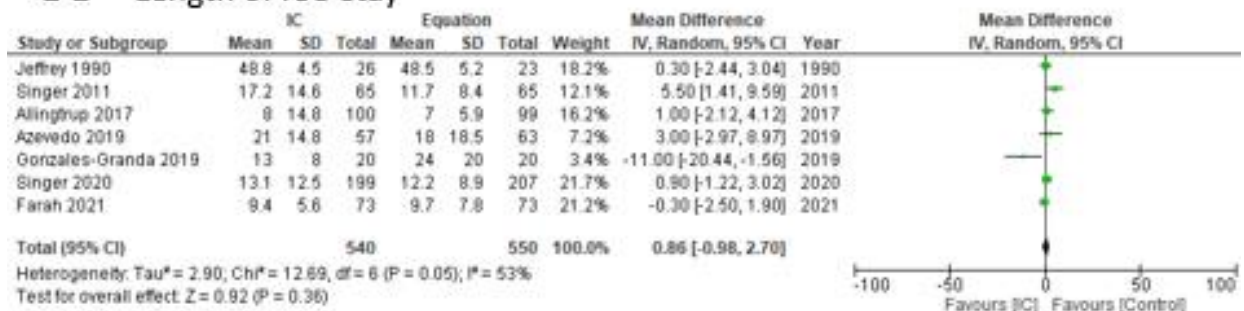

### 2-3 Duration of mechanical ventilation

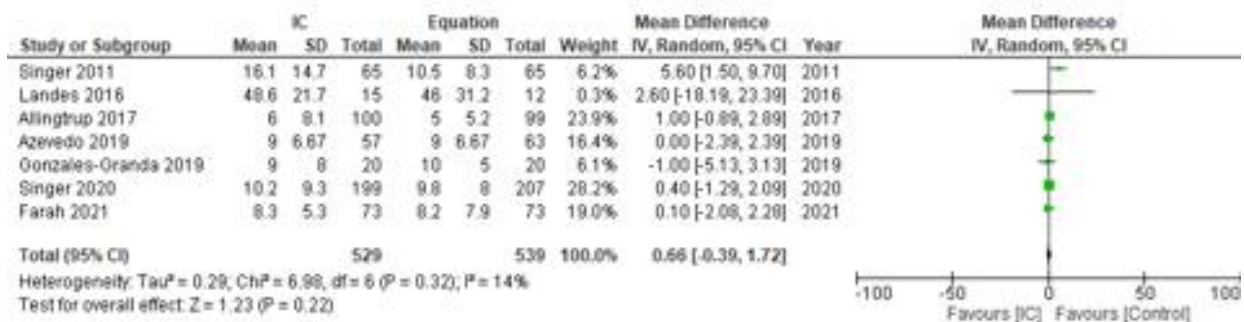

### 2-4 All infections

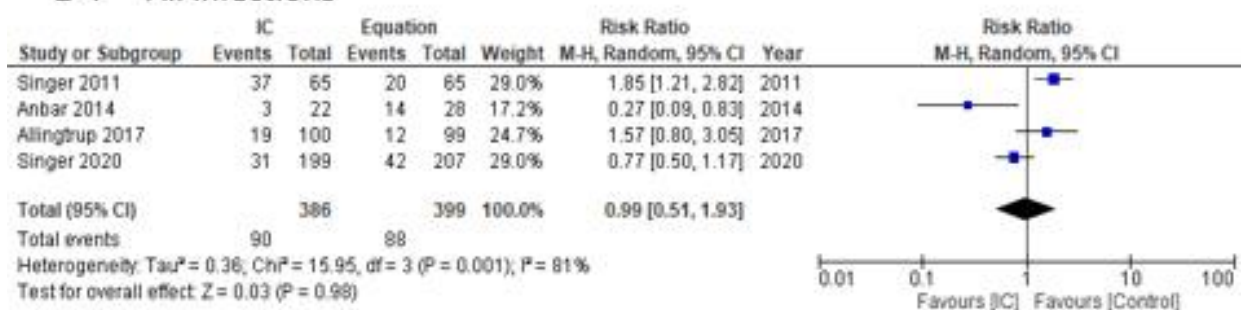

## 2-5 Ventilator-associated pneumonia

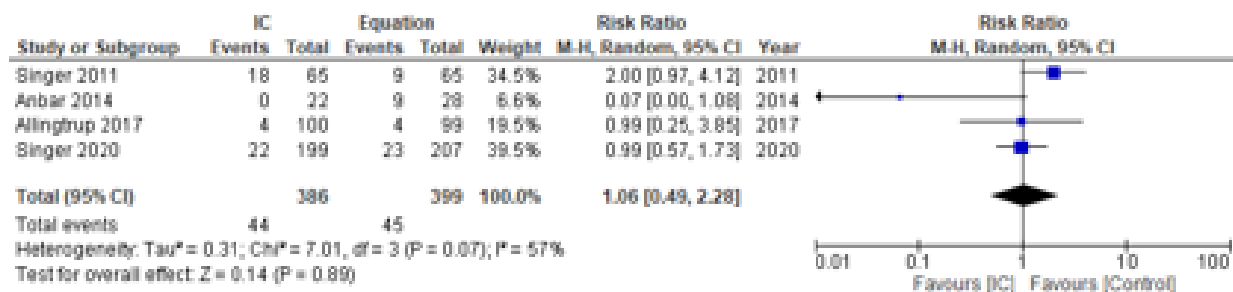

## 2-6 Physical functions (physical component summary)

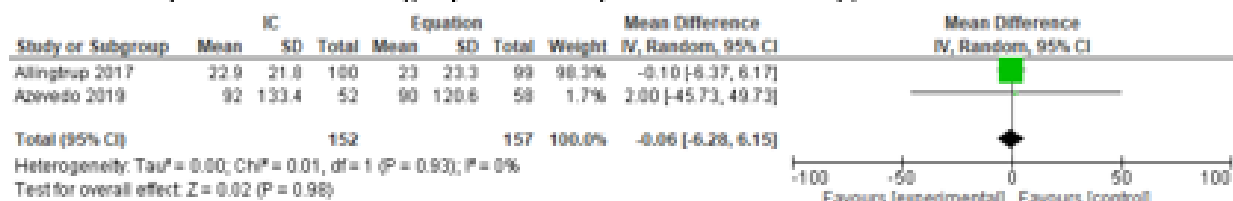

## 2-7 Adverse events (kidney)

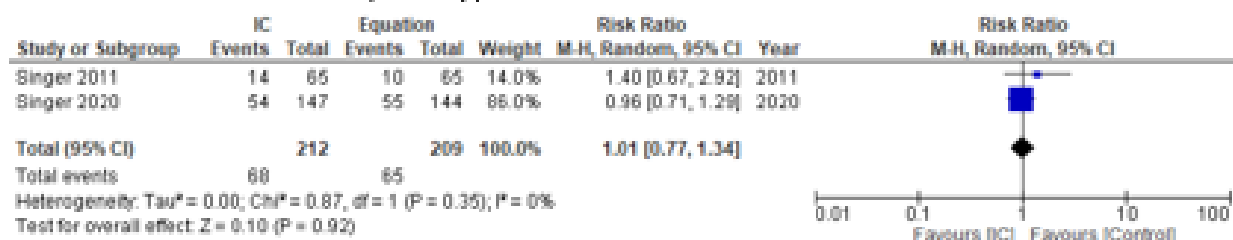

## 2-8 Adverse events (liver)

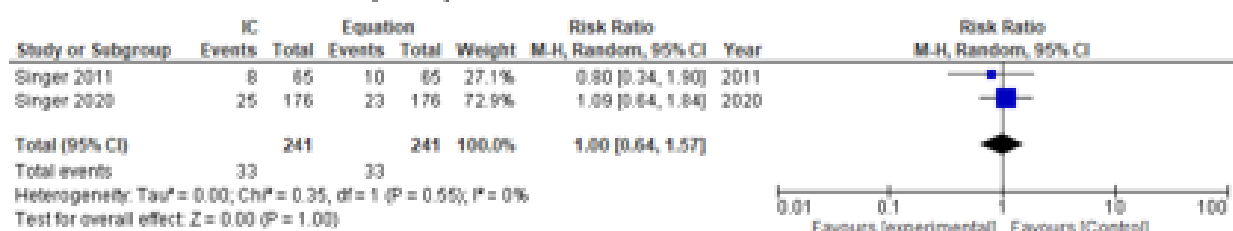

## Supplementary Figure S2. Forest plot for outcomes.

2-1. Short-term mortality. 2-2. Length of ICU stay. 2-3. Duration of mechanical ventilation.  
 2-4. All infections. 2-5. Adverse events (kidney). 2-6. Adverse events (liver).

## 7. Post-hoc analyses of primary outcomes

### 3.1 Short-term mortality (frequency of IC measurements)

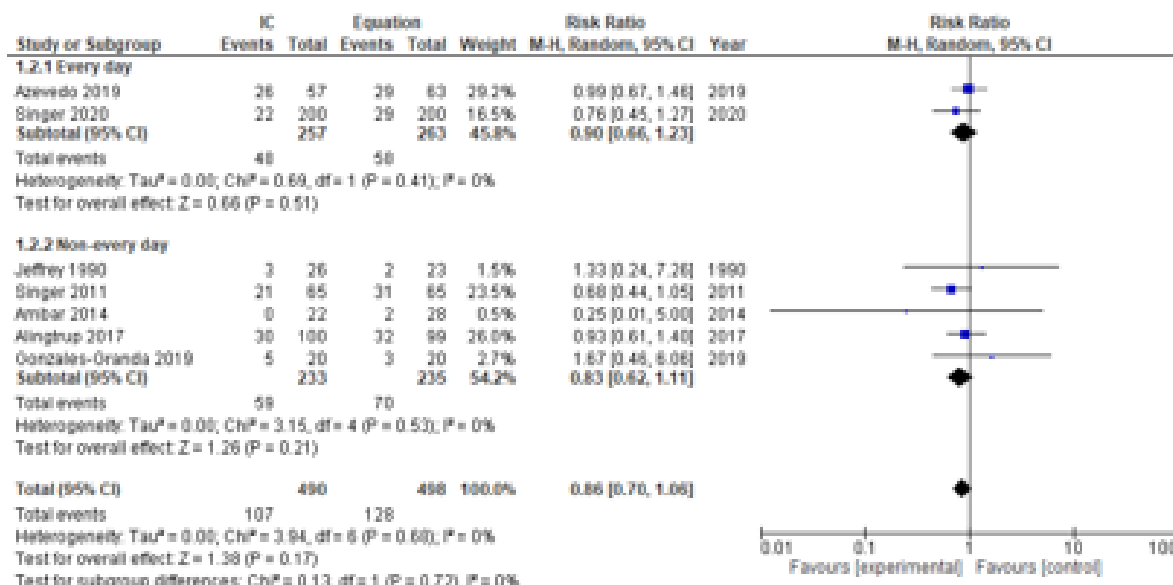

### 3.2 Short-term mortality (delivery calories)

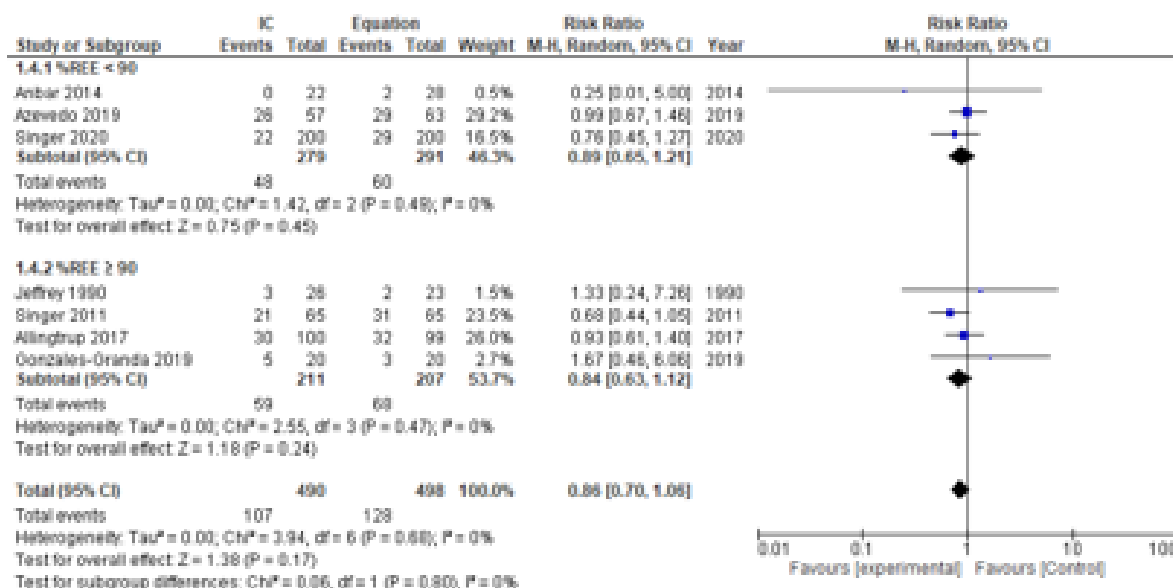



### 3.3 Short-term mortality (mechanically ventilated patients)

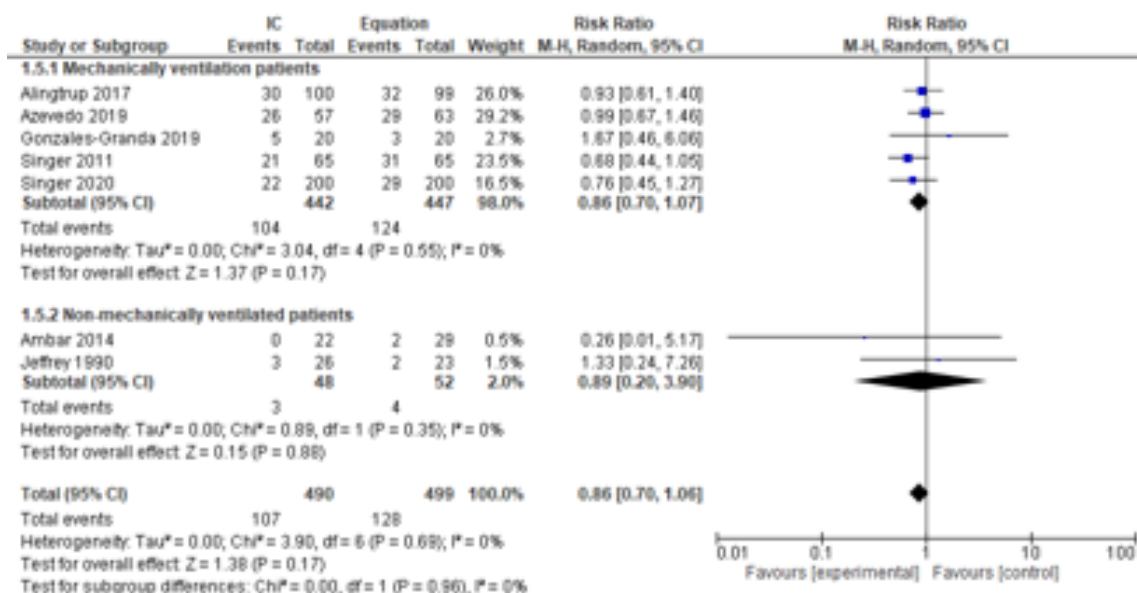

**Supplementary Figure S3. Post-hoc analyses of primary outcomes**

## 8. Subgroup analysis

### 2-1. Short-term mortality (burn patients)

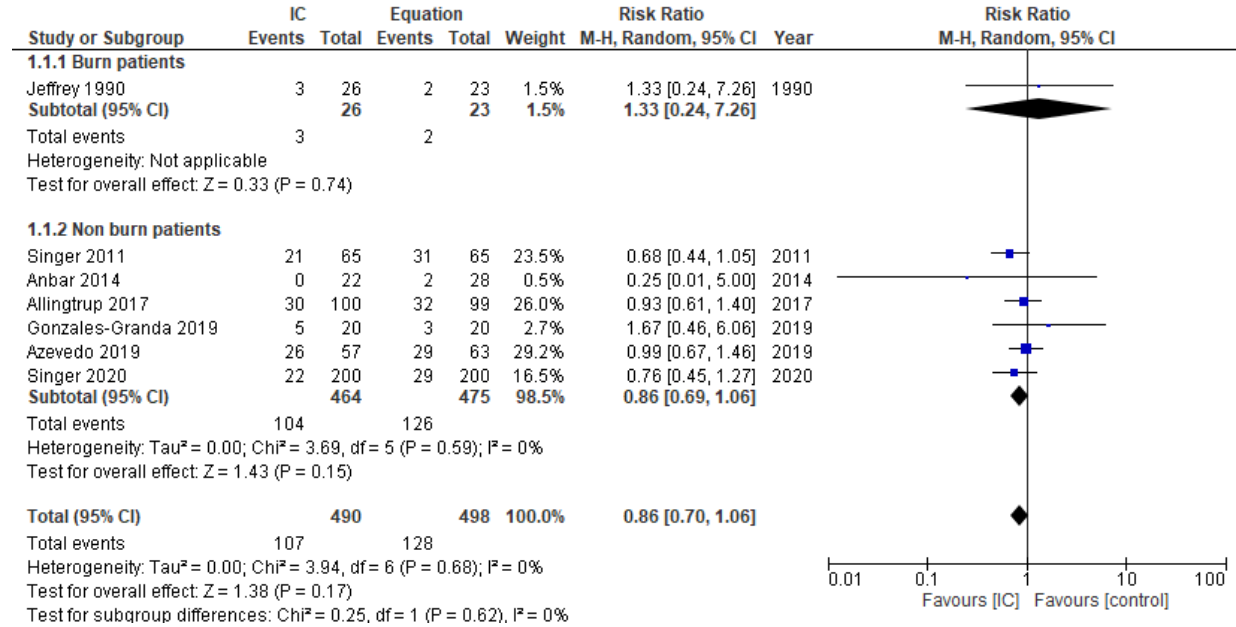

**Supplementary Figure S4. Subgroup analysis of primary outcomes**

## 9. Evidence profile

| Certainty assessment                            |                 |                           |              |                      |                     |                                     | Summary of findings   |                    |                             |                              |                                                  |
|-------------------------------------------------|-----------------|---------------------------|--------------|----------------------|---------------------|-------------------------------------|-----------------------|--------------------|-----------------------------|------------------------------|--------------------------------------------------|
| Participants<br>(studies)<br>Follow-up          | Risk of<br>bias | Inconsistency             | Indirectness | Imprecision          | Publication<br>bias | Overall<br>certainty of<br>evidence | Study event rates (%) |                    | Relative effect<br>(95% CI) | Anticipated absolute effects |                                                  |
|                                                 |                 |                           |              |                      |                     |                                     | With<br>Equation      | With IC            |                             | Risk with<br>Equation        | Risk difference with IC                          |
| Short-term mortality                            |                 |                           |              |                      |                     |                                     |                       |                    |                             |                              |                                                  |
| 988<br>(7 RCTs)                                 | not<br>serious  | not serious               | not serious  | serious <sup>a</sup> | none                | ⊕⊕⊕○<br>Moderate                    | 128/498<br>(25.7%)    | 107/490<br>(21.8%) | RR 0.86<br>(0.70 to 1.06)   | 257 per<br>1,000             | 36 fewer per 1,000<br>(from 77 fewer to 15 more) |
| Length of ICU stay                              |                 |                           |              |                      |                     |                                     |                       |                    |                             |                              |                                                  |
| 1090<br>(7 RCTs)                                | not<br>serious  | serious <sup>b</sup>      | not serious  | serious <sup>c</sup> | none                | ⊕⊕○○<br>Low                         | 550                   | 540                | -                           |                              | MD 0.86 higher<br>(0.98 lower to 2.7 higher)     |
| Duration of mechanical ventilation              |                 |                           |              |                      |                     |                                     |                       |                    |                             |                              |                                                  |
| 1068<br>(7 RCTs)                                | not<br>serious  | not serious               | not serious  | serious <sup>c</sup> | none                | ⊕⊕⊕○<br>Moderate                    | 539                   | 529                | -                           |                              | MD 0.66 higher<br>(0.39 lower to 1.72 higher)    |
| All infections                                  |                 |                           |              |                      |                     |                                     |                       |                    |                             |                              |                                                  |
| 785<br>(4 RCTs)                                 | not<br>serious  | very serious <sup>d</sup> | not serious  | serious <sup>a</sup> | none                | ⊕○○○<br>Very low                    | 88/399<br>(22.1%)     | 90/386<br>(23.3%)  | RR 0.99<br>(0.51 to 1.93)   | 221 per<br>1,000             | 13 more per 1,000<br>(from 40 fewer to 82 more)  |
| Ventilator-associated pneumonia                 |                 |                           |              |                      |                     |                                     |                       |                    |                             |                              |                                                  |
| 785<br>(4 RCTs)                                 | not<br>serious  | serious <sup>b</sup>      | not serious  | serious <sup>a</sup> | none                | ⊕⊕○○<br>Low                         | 45/399<br>(11.3%)     | 44/386<br>(11.4%)  | RR 1.06<br>(0.49 to 2.28)   | 113 per<br>1,000             | 2 more per 1,000<br>(from 35 fewer to 58 more)   |
| Physical functions (physical component summary) |                 |                           |              |                      |                     |                                     |                       |                    |                             |                              |                                                  |
| 309<br>(2 RCTs)                                 | not<br>serious  | not serious               | not serious  | serious <sup>c</sup> | none                | ⊕⊕⊕○<br>Moderate                    | 152                   | 157                | -                           |                              | MD 0.06 lower<br>(6.28 lower to 6.15 higher)     |
| Adverse events (kidney)                         |                 |                           |              |                      |                     |                                     |                       |                    |                             |                              |                                                  |
| 421<br>(2 RCTs)                                 | not<br>serious  | not serious               | not serious  | serious <sup>a</sup> | none                | ⊕⊕⊕○<br>Moderate                    | 65/209<br>(31.1%)     | 68/212<br>(32.1%)  | RR 1.01<br>(0.77 to 1.34)   | 311 per<br>1,000             | 9 more per 1,000<br>(from 68 fewer to 112 more)  |
| Adverse events (liver)                          |                 |                           |              |                      |                     |                                     |                       |                    |                             |                              |                                                  |
| 482<br>(2 RCTs)                                 | not<br>serious  | not serious               | not serious  | serious <sup>a</sup> | none                | ⊕⊕⊕○<br>Moderate                    | 33/241<br>(13.7%)     | 33/241<br>(13.7%)  | RR 1.00<br>(0.64 to 1.57)   | 137 per<br>1,000             | 0 fewer per 1,000<br>(from 49 fewer to 78 more)  |

## Supplemental table S5. Evidence profile

**CI:** confidence interval; **MD:** mean difference; **RR:** risk ratio; **IC:** indirect calorimetric; **ICU:** intensive care unit.

Explanations

- a. Downgraded one point for imprecision: because the sample size is less than  $N=2000$  (calculate OIS based on  $\alpha=0.05$ ,  $\beta=0.2$ , Event=20%, RRR=25%,  $N=2000$ )
- b. Downgraded one point for inconsistency: because the percentage of variation between studies ( $I^2$ ) is high
- c. Downgraded one point for imprecision: because the sample size is less than  $N=800$  (calculate OIS based on empirical thresholds;  $\alpha=0.05$ ,  $\beta=0.2$ ,  $d=0.2\sim0.3$ ,  $N=800$ )
- d. Downgraded two points for inconsistency: because the percentage of variation between studies ( $I^2$ ) is high and significant in the heterogeneity test
